# Supplementary material for: Rapid differentiation of infectious salmon anemia virus avirulent (HPR0) from virulent (HPRΔ) variants using multiplex RT-qPCR
Source: PubMed Central journal article supplement — J Vet Diagn Invest. 2024 Jan 11;36(3):329–37. doi: 10.1177/10406387231223290 (PMC11110766; doi:10.1177/10406387231223290), 2024-01-11
Supplement: sj-pdf-1-vdi-10.1177_10406387231223290.pdf [file sj-pdf-1-vdi-10.1177_10406387231223290.pdf]

JVDI: Supplemental material

Rounsville TF Jr, et al. Rapid differentiation of infectious salmon anemia virus avirulent (HPR0) from virulent (HPR $\Delta$ ) variants using multiplex RT-qPCR

**Supplemental Table 1.** The infectious salmon anemia virus (ISAV) sequences we used to develop the HPR-F/HPR-R/HPR0-HE22 hydrolysis probe assay, including the NCBI GenBank accessions, strains, and isolates (when available), locality, and genotype, as well as a hyperlink to the GenBank accession. We aligned >600 sequences and used them as reference material during assay development.

| GenBank accession | Strain    | Isolate             | Locality | Genotype | Link                                                                                                          |
|-------------------|-----------|---------------------|----------|----------|---------------------------------------------------------------------------------------------------------------|
| HQ011267.1        |           | ADL-PM 3205/ISAV-07 | Chile    | European | <a href="https://www.ncbi.nlm.nih.gov/nuccore/HQ011267">https://www.ncbi.nlm.nih.gov/nuccore/HQ011267</a>     |
| FJ786983.1        |           | 31991-3N            | Chile    |          | <a href="https://www.ncbi.nlm.nih.gov/nuccore/FJ786983.1">https://www.ncbi.nlm.nih.gov/nuccore/FJ786983.1</a> |
| EF105374.1        |           | ILA149              | Norway   | European | <a href="https://www.ncbi.nlm.nih.gov/nuccore/EF105374.1">https://www.ncbi.nlm.nih.gov/nuccore/EF105374.1</a> |
| FN687286.1        | ISA2/07-1 |                     | Norway   |          | <a href="https://www.ncbi.nlm.nih.gov/nuccore/FN687286.1">https://www.ncbi.nlm.nih.gov/nuccore/FN687286.1</a> |
| AF302801.1        |           | Gulesfjord/94       | Norway   |          | <a href="https://www.ncbi.nlm.nih.gov/nuccore/AF302801.1">https://www.ncbi.nlm.nih.gov/nuccore/AF302801.1</a> |
| DQ785255.1        |           | ISAV11(93/09/2264)  | Norway   |          | <a href="https://www.ncbi.nlm.nih.gov/nuccore/DQ785255.1">https://www.ncbi.nlm.nih.gov/nuccore/DQ785255.1</a> |
| JN711074.1        |           | T121/07             | Norway   |          | <a href="https://www.ncbi.nlm.nih.gov/nuccore/JN711074.1">https://www.ncbi.nlm.nih.gov/nuccore/JN711074.1</a> |
| JN711076.1        |           | T126/07             | Norway   |          | <a href="https://www.ncbi.nlm.nih.gov/nuccore/JN711076.1">https://www.ncbi.nlm.nih.gov/nuccore/JN711076.1</a> |
| FN687287.1        |           | ISA2/07-2           | Norway   |          | <a href="https://www.ncbi.nlm.nih.gov/nuccore/FN687287.1">https://www.ncbi.nlm.nih.gov/nuccore/FN687287.1</a> |
| FJ786984.1        |           | Chile               | Chile    |          | <a href="https://www.ncbi.nlm.nih.gov/nuccore/FJ786984.1">https://www.ncbi.nlm.nih.gov/nuccore/FJ786984.1</a> |
| AY127882.1        |           | N5/89               |          |          | <a href="https://www.ncbi.nlm.nih.gov/nuccore/AY127882.1">https://www.ncbi.nlm.nih.gov/nuccore/AY127882.1</a> |
| DQ785247.1        |           | ISAV(H2143/89)      | Norway   |          | <a href="https://www.ncbi.nlm.nih.gov/nuccore/DQ785247.1">https://www.ncbi.nlm.nih.gov/nuccore/DQ785247.1</a> |
| KY688256.1        |           | CA/NL/G0011/2013    | Canada   | European | <a href="https://www.ncbi.nlm.nih.gov/nuccore/KY688256.1">https://www.ncbi.nlm.nih.gov/nuccore/KY688256.1</a> |
| KY688255.1        |           | CA/NL/G0010/2013    | Canada   | European | <a href="https://www.ncbi.nlm.nih.gov/nuccore/KY688255.1">https://www.ncbi.nlm.nih.gov/nuccore/KY688255.1</a> |

Salmon isavirus phenotype multiplex RT-qPCR

|            |           |                  |        |          |                                                                                                               |
|------------|-----------|------------------|--------|----------|---------------------------------------------------------------------------------------------------------------|
| FJ786980.1 |           | 31807-2          | Chile  |          | <a href="https://www.ncbi.nlm.nih.gov/nuccore/FJ786980.1">https://www.ncbi.nlm.nih.gov/nuccore/FJ786980.1</a> |
| KR998473.1 |           | FJ786980.1       | Canada |          | <a href="https://www.ncbi.nlm.nih.gov/nuccore/KR998473.1">https://www.ncbi.nlm.nih.gov/nuccore/KR998473.1</a> |
| FJ483819.1 |           | CH3972/08        | Chile  |          | <a href="https://www.ncbi.nlm.nih.gov/nuccore/FJ483819.1">https://www.ncbi.nlm.nih.gov/nuccore/FJ483819.1</a> |
| FJ483818.1 |           | CH7988/08        | Chile  |          | <a href="https://www.ncbi.nlm.nih.gov/nuccore/FJ483818.1">https://www.ncbi.nlm.nih.gov/nuccore/FJ483818.1</a> |
| FJ483817.1 |           | CH900/08         | Chile  |          | <a href="https://www.ncbi.nlm.nih.gov/nuccore/FJ483817.1">https://www.ncbi.nlm.nih.gov/nuccore/FJ483817.1</a> |
| FN687355.1 | AR13/08-2 |                  | Norway |          | <a href="https://www.ncbi.nlm.nih.gov/nuccore/FN687355.1">https://www.ncbi.nlm.nih.gov/nuccore/FN687355.1</a> |
| FN687305.1 | ISA1/08   |                  | Norway |          | <a href="https://www.ncbi.nlm.nih.gov/nuccore/FN687305.1">https://www.ncbi.nlm.nih.gov/nuccore/FN687305.1</a> |
| MH397919.1 |           | SF183/13         | Norway |          | <a href="https://www.ncbi.nlm.nih.gov/nuccore/MH397919.1">https://www.ncbi.nlm.nih.gov/nuccore/MH397919.1</a> |
| JN711065.1 |           | MR139/08         | Norway |          | <a href="https://www.ncbi.nlm.nih.gov/nuccore/JN711065.1">https://www.ncbi.nlm.nih.gov/nuccore/JN711065.1</a> |
| FN687354.1 | AR13/08-1 |                  | Norway |          | <a href="https://www.ncbi.nlm.nih.gov/nuccore/FN687354.1">https://www.ncbi.nlm.nih.gov/nuccore/FN687354.1</a> |
| FN687311.1 | ISA4/08-2 |                  | Norway |          | <a href="https://www.ncbi.nlm.nih.gov/nuccore/FN687311.1">https://www.ncbi.nlm.nih.gov/nuccore/FN687311.1</a> |
| FN687310.1 | ISA4/08-1 |                  | Norway |          | <a href="https://www.ncbi.nlm.nih.gov/nuccore/FN687310.1">https://www.ncbi.nlm.nih.gov/nuccore/FN687310.1</a> |
| JN711057.1 |           | FM114/05         | Norway |          | <a href="https://www.ncbi.nlm.nih.gov/nuccore/JN711057.1">https://www.ncbi.nlm.nih.gov/nuccore/JN711057.1</a> |
| JN711068.1 |           | NT115/05         | Norway |          | <a href="https://www.ncbi.nlm.nih.gov/nuccore/JN711068.1">https://www.ncbi.nlm.nih.gov/nuccore/JN711068.1</a> |
| MH397878.1 |           | FM117/06         | Norway |          | <a href="https://www.ncbi.nlm.nih.gov/nuccore/MH397878.1">https://www.ncbi.nlm.nih.gov/nuccore/MH397878.1</a> |
| MH397879.1 |           | FM117/06         | Norway |          | <a href="https://www.ncbi.nlm.nih.gov/nuccore/MH397879.1">https://www.ncbi.nlm.nih.gov/nuccore/MH397879.1</a> |
| JN711058.1 |           | FM116/06         | Norway |          | <a href="https://www.ncbi.nlm.nih.gov/nuccore/JN711058.1">https://www.ncbi.nlm.nih.gov/nuccore/JN711058.1</a> |
| FR751547.1 | 200601B   |                  | Norway |          | <a href="https://www.ncbi.nlm.nih.gov/nuccore/FR751547.1">https://www.ncbi.nlm.nih.gov/nuccore/FR751547.1</a> |
| FR751546.1 | 200601A   |                  | Norway |          | <a href="https://www.ncbi.nlm.nih.gov/nuccore/FR751546.1">https://www.ncbi.nlm.nih.gov/nuccore/FR751546.1</a> |
| MH397934.1 |           | N187d/14         | Norway |          | <a href="https://www.ncbi.nlm.nih.gov/nuccore/MH397934.1">https://www.ncbi.nlm.nih.gov/nuccore/MH397934.1</a> |
| MH397932.1 |           | N187b/14         | Norway |          | <a href="https://www.ncbi.nlm.nih.gov/nuccore/MH397932.1">https://www.ncbi.nlm.nih.gov/nuccore/MH397932.1</a> |
| KY688270.1 |           | CA/NL/G0078/2015 | Canada | European | <a href="https://www.ncbi.nlm.nih.gov/nuccore/KY688270.1">https://www.ncbi.nlm.nih.gov/nuccore/KY688270.1</a> |
| KY688246.1 |           | CA/NL/G0078/2015 | Canada |          | <a href="https://www.ncbi.nlm.nih.gov/nuccore/KY688246.1">https://www.ncbi.nlm.nih.gov/nuccore/KY688246.1</a> |
| AY127880.1 |           | SF70/02          |        |          | <a href="https://www.ncbi.nlm.nih.gov/nuccore/AY127880.1">https://www.ncbi.nlm.nih.gov/nuccore/AY127880.1</a> |
| MH397930.1 |           | N185b/14         | Norway |          | <a href="https://www.ncbi.nlm.nih.gov/nuccore/MH397930.1">https://www.ncbi.nlm.nih.gov/nuccore/MH397930.1</a> |
| JN711090.1 |           | T161/09          | Norway |          | <a href="https://www.ncbi.nlm.nih.gov/nuccore/JN711090.1">https://www.ncbi.nlm.nih.gov/nuccore/JN711090.1</a> |
| MH708656.1 |           | CA/NB7178/08     | Canada | EU-NA    | <a href="https://www.ncbi.nlm.nih.gov/nuccore/MH708656.1">https://www.ncbi.nlm.nih.gov/nuccore/MH708656.1</a> |
| MH708655.1 |           | CA/NB04-85-1/04  | Canada | EU-NA    | <a href="https://www.ncbi.nlm.nih.gov/nuccore/MH708655.1">https://www.ncbi.nlm.nih.gov/nuccore/MH708655.1</a> |
| MH708654.1 |           | CA/F679/99       | Canada | EU-NA    | <a href="https://www.ncbi.nlm.nih.gov/nuccore/MH708654.1">https://www.ncbi.nlm.nih.gov/nuccore/MH708654.1</a> |
| KY688218.1 |           | CA/NB/G0002/2015 | Canada | European | <a href="https://www.ncbi.nlm.nih.gov/nuccore/KY688218.1">https://www.ncbi.nlm.nih.gov/nuccore/KY688218.1</a> |

Salmon isavirus phenotype multiplex RT-qPCR

|            |               |                     |              |          |                                                                                                               |
|------------|---------------|---------------------|--------------|----------|---------------------------------------------------------------------------------------------------------------|
| KY688241.1 |               | CA/NB/G0048/2013    | Canada       | European | <a href="https://www.ncbi.nlm.nih.gov/nuccore/KY688241.1">https://www.ncbi.nlm.nih.gov/nuccore/KY688241.1</a> |
| KY688228.1 |               | CA/NB/G0014/2014    | Canada       | European | <a href="https://www.ncbi.nlm.nih.gov/nuccore/KY688228.1">https://www.ncbi.nlm.nih.gov/nuccore/KY688228.1</a> |
| AY963263.1 |               | RCP/NB 04-085-1     | Canada       |          | <a href="https://www.ncbi.nlm.nih.gov/nuccore/AY963263.1">https://www.ncbi.nlm.nih.gov/nuccore/AY963263.1</a> |
| DQ785254.1 |               | ISAV10(95)          | Norway       |          | <a href="https://www.ncbi.nlm.nih.gov/nuccore/DQ785254.1">https://www.ncbi.nlm.nih.gov/nuccore/DQ785254.1</a> |
| EU849016.1 | VT11282007-36 | Biovac 26905-1      | Chile        |          | <a href="https://www.ncbi.nlm.nih.gov/nuccore/EU849016.1">https://www.ncbi.nlm.nih.gov/nuccore/EU849016.1</a> |
| EU999162.1 |               | Aquagestion 13492-9 | Chile        | European | <a href="https://www.ncbi.nlm.nih.gov/nuccore/EU999162.1">https://www.ncbi.nlm.nih.gov/nuccore/EU999162.1</a> |
| AF388581.1 |               | 301/98              | UK: Scotland |          | <a href="https://www.ncbi.nlm.nih.gov/nuccore/AF388581.1">https://www.ncbi.nlm.nih.gov/nuccore/AF388581.1</a> |
| MH397944.1 |               | T191/14             | Norway       |          | <a href="https://www.ncbi.nlm.nih.gov/nuccore/MH397944.1">https://www.ncbi.nlm.nih.gov/nuccore/MH397944.1</a> |
| AY127875.1 |               | ST30/97             |              |          | <a href="https://www.ncbi.nlm.nih.gov/nuccore/AY127875.1">https://www.ncbi.nlm.nih.gov/nuccore/AY127875.1</a> |
| DQ785249.1 |               | ISAV5(96/09/768)    | Norway       |          | <a href="https://www.ncbi.nlm.nih.gov/nuccore/DQ785249.1">https://www.ncbi.nlm.nih.gov/nuccore/DQ785249.1</a> |
| FJ786977.1 |               | 24984-1             | Chile        |          | <a href="https://www.ncbi.nlm.nih.gov/nuccore/FJ786977.1">https://www.ncbi.nlm.nih.gov/nuccore/FJ786977.1</a> |
| AF302803.1 |               | Vedoy/99            | Norway       |          | <a href="https://www.ncbi.nlm.nih.gov/nuccore/AF302803.1">https://www.ncbi.nlm.nih.gov/nuccore/AF302803.1</a> |
| AY744393.1 |               | SF83/04             | Norway       |          | <a href="https://www.ncbi.nlm.nih.gov/nuccore/AY744393.1">https://www.ncbi.nlm.nih.gov/nuccore/AY744393.1</a> |
| DQ785245.1 |               | ISAV1(96/09/1712)   | Norway       |          | <a href="https://www.ncbi.nlm.nih.gov/nuccore/DQ785245.1">https://www.ncbi.nlm.nih.gov/nuccore/DQ785245.1</a> |
| HE800172.1 | SC16 10C      |                     | Norway       |          | <a href="https://www.ncbi.nlm.nih.gov/nuccore/HE800172.1">https://www.ncbi.nlm.nih.gov/nuccore/HE800172.1</a> |
| HE800166.1 | Sc13 10       |                     | Norway       |          | <a href="https://www.ncbi.nlm.nih.gov/nuccore/HE800166.1">https://www.ncbi.nlm.nih.gov/nuccore/HE800166.1</a> |
| HE800161.1 | SC9 10A       |                     | Norway       |          | <a href="https://www.ncbi.nlm.nih.gov/nuccore/HE800161.1">https://www.ncbi.nlm.nih.gov/nuccore/HE800161.1</a> |
| HE800151.1 | SC2 09C       |                     | Norway       |          | <a href="https://www.ncbi.nlm.nih.gov/nuccore/HE800151.1">https://www.ncbi.nlm.nih.gov/nuccore/HE800151.1</a> |
| HE800150.1 | SC2 09B       |                     | Norway       |          | <a href="https://www.ncbi.nlm.nih.gov/nuccore/HE800150.1">https://www.ncbi.nlm.nih.gov/nuccore/HE800150.1</a> |
| HE800144.1 | AR4 08        |                     | Norway       |          | <a href="https://www.ncbi.nlm.nih.gov/nuccore/HE800144.1">https://www.ncbi.nlm.nih.gov/nuccore/HE800144.1</a> |
| MH397946.1 |               | T211b/13            | Norway       |          | <a href="https://www.ncbi.nlm.nih.gov/nuccore/MH397946.1">https://www.ncbi.nlm.nih.gov/nuccore/MH397946.1</a> |
| MH397945.1 |               | T211a/13            | Norway       |          | <a href="https://www.ncbi.nlm.nih.gov/nuccore/MH397945.1">https://www.ncbi.nlm.nih.gov/nuccore/MH397945.1</a> |
| MH397942.1 |               | T176/12             | Norway       |          | <a href="https://www.ncbi.nlm.nih.gov/nuccore/MH397942.1">https://www.ncbi.nlm.nih.gov/nuccore/MH397942.1</a> |
| MH397907.1 |               | MR102c/05           | Norway       |          | <a href="https://www.ncbi.nlm.nih.gov/nuccore/MH397907.1">https://www.ncbi.nlm.nih.gov/nuccore/MH397907.1</a> |
| FN687357.1 | AR26/08-2     |                     | Norway       |          | <a href="https://www.ncbi.nlm.nih.gov/nuccore/FN687357.1">https://www.ncbi.nlm.nih.gov/nuccore/FN687357.1</a> |
| FN687356.1 | AR26/08-1     |                     | Norway       |          | <a href="https://www.ncbi.nlm.nih.gov/nuccore/FN687356.1">https://www.ncbi.nlm.nih.gov/nuccore/FN687356.1</a> |
| FN687352.1 | AR8/08        |                     | Norway       |          | <a href="https://www.ncbi.nlm.nih.gov/nuccore/FN687352.1">https://www.ncbi.nlm.nih.gov/nuccore/FN687352.1</a> |
| FN687348.1 | AR2/08        |                     | Norway       |          | <a href="https://www.ncbi.nlm.nih.gov/nuccore/FN687348.1">https://www.ncbi.nlm.nih.gov/nuccore/FN687348.1</a> |
| HE800169.1 | SC15 10       |                     | Norway       |          | <a href="https://www.ncbi.nlm.nih.gov/nuccore/HE800169.1">https://www.ncbi.nlm.nih.gov/nuccore/HE800169.1</a> |
| HE800180.1 | IAS6 10A      |                     | Norway       |          | <a href="https://www.ncbi.nlm.nih.gov/nuccore/HE800180.1">https://www.ncbi.nlm.nih.gov/nuccore/HE800180.1</a> |

Salmon isavirus phenotype multiplex RT-qPCR

|            |            |          |        |                                                                                                               |
|------------|------------|----------|--------|---------------------------------------------------------------------------------------------------------------|
| HE800173.1 | SC17 10    |          | Norway | <a href="https://www.ncbi.nlm.nih.gov/nuccore/HE800173.1">https://www.ncbi.nlm.nih.gov/nuccore/HE800173.1</a> |
| HE800171.1 | SC16 10B   |          | Norway | <a href="https://www.ncbi.nlm.nih.gov/nuccore/HE800171.1">https://www.ncbi.nlm.nih.gov/nuccore/HE800171.1</a> |
| HE800162.1 | SC19 10A   |          | Norway | <a href="https://www.ncbi.nlm.nih.gov/nuccore/HE800162.1">https://www.ncbi.nlm.nih.gov/nuccore/HE800162.1</a> |
| KC907289.1 | SCN        |          | Norway | <a href="https://www.ncbi.nlm.nih.gov/nuccore/KC907289.1">https://www.ncbi.nlm.nih.gov/nuccore/KC907289.1</a> |
| HE800170.1 | SC16 10A   |          | Norway | <a href="https://www.ncbi.nlm.nih.gov/nuccore/HE800170.1">https://www.ncbi.nlm.nih.gov/nuccore/HE800170.1</a> |
| HE800156.1 | SC2 10B    |          | Norway | <a href="https://www.ncbi.nlm.nih.gov/nuccore/HE800156.1">https://www.ncbi.nlm.nih.gov/nuccore/HE800156.1</a> |
| HE800154.1 | SC1 10     |          | Norway | <a href="https://www.ncbi.nlm.nih.gov/nuccore/HE800154.1">https://www.ncbi.nlm.nih.gov/nuccore/HE800154.1</a> |
| HE800155.1 | Sc2 10A    |          | Norway | <a href="https://www.ncbi.nlm.nih.gov/nuccore/HE800155.1">https://www.ncbi.nlm.nih.gov/nuccore/HE800155.1</a> |
| FN687308.1 | ISA3/08-1  |          | Norway | <a href="https://www.ncbi.nlm.nih.gov/nuccore/FN687308.1">https://www.ncbi.nlm.nih.gov/nuccore/FN687308.1</a> |
| MH397935.1 |            | N188/14  | Norway | <a href="https://www.ncbi.nlm.nih.gov/nuccore/MH397935.1">https://www.ncbi.nlm.nih.gov/nuccore/MH397935.1</a> |
| MH397931.1 |            | N187a/14 | Norway | <a href="https://www.ncbi.nlm.nih.gov/nuccore/MH397931.1">https://www.ncbi.nlm.nih.gov/nuccore/MH397931.1</a> |
| MH397936.1 |            | N189/14  | Norway | <a href="https://www.ncbi.nlm.nih.gov/nuccore/MH397936.1">https://www.ncbi.nlm.nih.gov/nuccore/MH397936.1</a> |
| MH397933.1 |            | N187c/14 | Norway | <a href="https://www.ncbi.nlm.nih.gov/nuccore/MH397933.1">https://www.ncbi.nlm.nih.gov/nuccore/MH397933.1</a> |
| FN687341.1 | ISA4/09-2  |          | Norway | <a href="https://www.ncbi.nlm.nih.gov/nuccore/FN687341.1">https://www.ncbi.nlm.nih.gov/nuccore/FN687341.1</a> |
| FN687340.1 | ISA4/09-1  |          | Norway | <a href="https://www.ncbi.nlm.nih.gov/nuccore/FN687340.1">https://www.ncbi.nlm.nih.gov/nuccore/FN687340.1</a> |
| JN711072.1 |            | NT156/09 | Norway | <a href="https://www.ncbi.nlm.nih.gov/nuccore/JN711072.1">https://www.ncbi.nlm.nih.gov/nuccore/JN711072.1</a> |
| JN711071.1 |            | NT155/09 | Norway | <a href="https://www.ncbi.nlm.nih.gov/nuccore/JN711071.1">https://www.ncbi.nlm.nih.gov/nuccore/JN711071.1</a> |
| JN711073.1 |            | ST143/08 | Norway | <a href="https://www.ncbi.nlm.nih.gov/nuccore/JN711073.1">https://www.ncbi.nlm.nih.gov/nuccore/JN711073.1</a> |
| FN687319.1 | ISA9/08-1  |          | Norway | <a href="https://www.ncbi.nlm.nih.gov/nuccore/FN687319.1">https://www.ncbi.nlm.nih.gov/nuccore/FN687319.1</a> |
| FN687320.1 | Isa9/08-2  |          | Norway | <a href="https://www.ncbi.nlm.nih.gov/nuccore/FN687320.1">https://www.ncbi.nlm.nih.gov/nuccore/FN687320.1</a> |
| MH397943.1 |            | T181/13  | Norway | <a href="https://www.ncbi.nlm.nih.gov/nuccore/MH397943.1">https://www.ncbi.nlm.nih.gov/nuccore/MH397943.1</a> |
| MH397923.1 |            | N179/13  | Norway | <a href="https://www.ncbi.nlm.nih.gov/nuccore/MH397923.1">https://www.ncbi.nlm.nih.gov/nuccore/MH397923.1</a> |
| MK125501.1 |            | T130/07  | Norway | <a href="https://www.ncbi.nlm.nih.gov/nuccore/MK125501.1">https://www.ncbi.nlm.nih.gov/nuccore/MK125501.1</a> |
| JN711083.1 |            | T148/08  | Norway | <a href="https://www.ncbi.nlm.nih.gov/nuccore/JN711083.1">https://www.ncbi.nlm.nih.gov/nuccore/JN711083.1</a> |
| JN711077.1 |            | T129/07  | Norway | <a href="https://www.ncbi.nlm.nih.gov/nuccore/JN711077.1">https://www.ncbi.nlm.nih.gov/nuccore/JN711077.1</a> |
| JN711075.1 |            | T122/07  | Norway | <a href="https://www.ncbi.nlm.nih.gov/nuccore/JN711075.1">https://www.ncbi.nlm.nih.gov/nuccore/JN711075.1</a> |
| FN687294.1 | ISA6/07-1  |          | Norway | <a href="https://www.ncbi.nlm.nih.gov/nuccore/FN687294.1">https://www.ncbi.nlm.nih.gov/nuccore/FN687294.1</a> |
| FN687335.1 | ISA1/09-2  |          | Norway | <a href="https://www.ncbi.nlm.nih.gov/nuccore/FN687335.1">https://www.ncbi.nlm.nih.gov/nuccore/FN687335.1</a> |
| FN687332.1 | ISA15/08-2 |          | Norway | <a href="https://www.ncbi.nlm.nih.gov/nuccore/FN687332.1">https://www.ncbi.nlm.nih.gov/nuccore/FN687332.1</a> |
| FN687331.1 | ISA15/08-1 |          | Norway | <a href="https://www.ncbi.nlm.nih.gov/nuccore/FN687331.1">https://www.ncbi.nlm.nih.gov/nuccore/FN687331.1</a> |

Salmon isavirus phenotype multiplex RT-qPCR

|            |            |                  |                     |          |                                                                                                               |
|------------|------------|------------------|---------------------|----------|---------------------------------------------------------------------------------------------------------------|
| FN687329.1 | ISA14/08-1 |                  | Norway              |          | <a href="https://www.ncbi.nlm.nih.gov/nuccore/FN687329.1">https://www.ncbi.nlm.nih.gov/nuccore/FN687329.1</a> |
| FN687342.1 | ISA5/09-1  |                  | Norway              |          | <a href="https://www.ncbi.nlm.nih.gov/nuccore/FN687342.1">https://www.ncbi.nlm.nih.gov/nuccore/FN687342.1</a> |
| FN687347.1 | ISA7/09-2  |                  | Norway              |          | <a href="https://www.ncbi.nlm.nih.gov/nuccore/FN687347.1">https://www.ncbi.nlm.nih.gov/nuccore/FN687347.1</a> |
| MH708660.1 |            | SC0/4750/09      | UK                  |          | <a href="https://www.ncbi.nlm.nih.gov/nuccore/MH708660.1">https://www.ncbi.nlm.nih.gov/nuccore/MH708660.1</a> |
| MH708659.1 |            | SC0/4661/08      | UK                  |          | <a href="https://www.ncbi.nlm.nih.gov/nuccore/MH708659.1">https://www.ncbi.nlm.nih.gov/nuccore/MH708659.1</a> |
| KC907292.1 | OBK        | OBK4s6           | Norway              |          | <a href="https://www.ncbi.nlm.nih.gov/nuccore/KC907292.1">https://www.ncbi.nlm.nih.gov/nuccore/KC907292.1</a> |
| KC907291.1 | OBK        | OBK2s6           | Norway              |          | <a href="https://www.ncbi.nlm.nih.gov/nuccore/KC907291.1">https://www.ncbi.nlm.nih.gov/nuccore/KC907291.1</a> |
| KC907290.1 | OBK        | OBK1s6           | Norway              |          | <a href="https://www.ncbi.nlm.nih.gov/nuccore/KC907290.1">https://www.ncbi.nlm.nih.gov/nuccore/KC907290.1</a> |
| AY646058.1 |            | EF6-6            | Canada: Nova Scotia |          | <a href="https://www.ncbi.nlm.nih.gov/nuccore/AY646058.1">https://www.ncbi.nlm.nih.gov/nuccore/AY646058.1</a> |
| AY646059.1 |            | EF5-5            | Canada: Nova Scotia |          | <a href="https://www.ncbi.nlm.nih.gov/nuccore/AY646059.1">https://www.ncbi.nlm.nih.gov/nuccore/AY646059.1</a> |
| KC907288.1 | SCN        | SCN4s6           | Norway              |          | <a href="https://www.ncbi.nlm.nih.gov/nuccore/KC907288.1">https://www.ncbi.nlm.nih.gov/nuccore/KC907288.1</a> |
| KC907287.1 | SCN        | SCN2s6           | Norway              |          | <a href="https://www.ncbi.nlm.nih.gov/nuccore/KC907287.1">https://www.ncbi.nlm.nih.gov/nuccore/KC907287.1</a> |
| KC907286.1 | SCN        | SCN1s6           | Norway              |          | <a href="https://www.ncbi.nlm.nih.gov/nuccore/KC907286.1">https://www.ncbi.nlm.nih.gov/nuccore/KC907286.1</a> |
| KY688257.1 |            | CA/NL/G0014/2013 | Canada              | European | <a href="https://www.ncbi.nlm.nih.gov/nuccore/KY688257.1">https://www.ncbi.nlm.nih.gov/nuccore/KY688257.1</a> |
| KY688268.1 |            | CA/NL/G0057/2013 | Canada              | European | <a href="https://www.ncbi.nlm.nih.gov/nuccore/KY688268.1">https://www.ncbi.nlm.nih.gov/nuccore/KY688268.1</a> |
| KX823922.1 |            | F0/121/14        | Faroe Islands       |          | <a href="https://www.ncbi.nlm.nih.gov/nuccore/KX823922.1">https://www.ncbi.nlm.nih.gov/nuccore/KX823922.1</a> |
| KX823921.1 |            | F0/07/12         | Faroe Islands       |          | <a href="https://www.ncbi.nlm.nih.gov/nuccore/KX823921.1">https://www.ncbi.nlm.nih.gov/nuccore/KX823921.1</a> |
| MH286494.1 |            | ST236/13         | Norway              |          | <a href="https://www.ncbi.nlm.nih.gov/nuccore/MH286494.1">https://www.ncbi.nlm.nih.gov/nuccore/MH286494.1</a> |
| MH286493.1 |            | ST235/14         | Norway              |          | <a href="https://www.ncbi.nlm.nih.gov/nuccore/MH286493.1">https://www.ncbi.nlm.nih.gov/nuccore/MH286493.1</a> |
| KY688243.1 |            | CA/NB/G0051/2012 | Canada              | European | <a href="https://www.ncbi.nlm.nih.gov/nuccore/KY688243.1">https://www.ncbi.nlm.nih.gov/nuccore/KY688243.1</a> |
| KY688236.1 |            | CA/NB/G0039/2014 | Canada              | European | <a href="https://www.ncbi.nlm.nih.gov/nuccore/KY688236.1">https://www.ncbi.nlm.nih.gov/nuccore/KY688236.1</a> |
| KY688230.1 |            | CA/NB/G0016/2014 | Canada              | European | <a href="https://www.ncbi.nlm.nih.gov/nuccore/KY688230.1">https://www.ncbi.nlm.nih.gov/nuccore/KY688230.1</a> |
| KY688223.1 |            | CA/NB/G0009/2015 | Canada              | European | <a href="https://www.ncbi.nlm.nih.gov/nuccore/KY688223.1">https://www.ncbi.nlm.nih.gov/nuccore/KY688223.1</a> |
| KY688229.1 |            | CA/NB/G0014/2015 | Canada              | European | <a href="https://www.ncbi.nlm.nih.gov/nuccore/KY688229.1">https://www.ncbi.nlm.nih.gov/nuccore/KY688229.1</a> |
| HQ259676.1 |            | Glesvar/2/90     | Norway              |          | <a href="https://www.ncbi.nlm.nih.gov/nuccore/HQ259676.1">https://www.ncbi.nlm.nih.gov/nuccore/HQ259676.1</a> |
| AF220607.1 |            | Glesvaer         |                     |          | <a href="https://www.ncbi.nlm.nih.gov/nuccore/AF220607.1">https://www.ncbi.nlm.nih.gov/nuccore/AF220607.1</a> |
| DQ785248.1 |            | ISAV4(90/09/400) | Norway              |          | <a href="https://www.ncbi.nlm.nih.gov/nuccore/DQ785248.1">https://www.ncbi.nlm.nih.gov/nuccore/DQ785248.1</a> |
| MH708657.1 |            | N0/Glesvaer/2/90 | Norway              |          | <a href="https://www.ncbi.nlm.nih.gov/nuccore/MH708657.1">https://www.ncbi.nlm.nih.gov/nuccore/MH708657.1</a> |
| AY151811.1 |            | Glesvaer         | Norway              |          | <a href="https://www.ncbi.nlm.nih.gov/nuccore/AY151811.1">https://www.ncbi.nlm.nih.gov/nuccore/AY151811.1</a> |
| AJ440972.1 |            | 1173/01/09       | Faroe Islands       |          | <a href="https://www.ncbi.nlm.nih.gov/nuccore/AJ440972.1">https://www.ncbi.nlm.nih.gov/nuccore/AJ440972.1</a> |

Salmon isavirus phenotype multiplex RT-qPCR

|            |           |                  |               |          |                                                                                                               |
|------------|-----------|------------------|---------------|----------|---------------------------------------------------------------------------------------------------------------|
| AY127879.1 |           | SF63/01          |               |          | <a href="https://www.ncbi.nlm.nih.gov/nuccore/AY127879.1">https://www.ncbi.nlm.nih.gov/nuccore/AY127879.1</a> |
| AF391126.1 |           | 1490/98          | UK: Scotland  |          | <a href="https://www.ncbi.nlm.nih.gov/nuccore/AF391126.1">https://www.ncbi.nlm.nih.gov/nuccore/AF391126.1</a> |
| HE800179.1 |           | ISA5 10B         | Norway        |          | <a href="https://www.ncbi.nlm.nih.gov/nuccore/HE800179.1">https://www.ncbi.nlm.nih.gov/nuccore/HE800179.1</a> |
| HE800178.1 |           | ISA5 10A         | Norway        |          | <a href="https://www.ncbi.nlm.nih.gov/nuccore/HE800178.1">https://www.ncbi.nlm.nih.gov/nuccore/HE800178.1</a> |
| FN687313.1 | ISA5/08-2 |                  | Norway        |          | <a href="https://www.ncbi.nlm.nih.gov/nuccore/FN687313.1">https://www.ncbi.nlm.nih.gov/nuccore/FN687313.1</a> |
| MH397911.1 |           | MR177/12         | Norway        |          | <a href="https://www.ncbi.nlm.nih.gov/nuccore/MH397911.1">https://www.ncbi.nlm.nih.gov/nuccore/MH397911.1</a> |
| JN711070.1 |           | NT141/08         | Norway        |          | <a href="https://www.ncbi.nlm.nih.gov/nuccore/JN711070.1">https://www.ncbi.nlm.nih.gov/nuccore/JN711070.1</a> |
| MH397941.1 |           | N239/17          | Norway        |          | <a href="https://www.ncbi.nlm.nih.gov/nuccore/MH397941.1">https://www.ncbi.nlm.nih.gov/nuccore/MH397941.1</a> |
| MH397893.1 |           | FM208d/16        | Norway        |          | <a href="https://www.ncbi.nlm.nih.gov/nuccore/MH397893.1">https://www.ncbi.nlm.nih.gov/nuccore/MH397893.1</a> |
| MH397892.1 |           | FM208c/16        | Norway        |          | <a href="https://www.ncbi.nlm.nih.gov/nuccore/MH397892.1">https://www.ncbi.nlm.nih.gov/nuccore/MH397892.1</a> |
| MH397891.1 |           | FM208b/16        | Norway        |          | <a href="https://www.ncbi.nlm.nih.gov/nuccore/MH397891.1">https://www.ncbi.nlm.nih.gov/nuccore/MH397891.1</a> |
| MH397890.1 |           | FM208a/16        | Norway        |          | <a href="https://www.ncbi.nlm.nih.gov/nuccore/MH397890.1">https://www.ncbi.nlm.nih.gov/nuccore/MH397890.1</a> |
| FN687312.1 | ISA5/08-1 |                  | Norway        |          | <a href="https://www.ncbi.nlm.nih.gov/nuccore/FN687312.1">https://www.ncbi.nlm.nih.gov/nuccore/FN687312.1</a> |
| KX823935.1 |           | F0/178/14        | Faroe Islands |          | <a href="https://www.ncbi.nlm.nih.gov/nuccore/KX823935.1">https://www.ncbi.nlm.nih.gov/nuccore/KX823935.1</a> |
| KX823934.1 |           | F0/151/14        | Faroe Islands |          | <a href="https://www.ncbi.nlm.nih.gov/nuccore/KX823934.1">https://www.ncbi.nlm.nih.gov/nuccore/KX823934.1</a> |
| KX823932.1 |           | F0/143/14        | Faroe Islands |          | <a href="https://www.ncbi.nlm.nih.gov/nuccore/KX823932.1">https://www.ncbi.nlm.nih.gov/nuccore/KX823932.1</a> |
| KY688269.1 |           | CA/NL/G0062/2014 | Canada        | European | <a href="https://www.ncbi.nlm.nih.gov/nuccore/KY688269.1">https://www.ncbi.nlm.nih.gov/nuccore/KY688269.1</a> |
| KY688264.1 |           | CA/NL/G0044/2012 | Canada        | European | <a href="https://www.ncbi.nlm.nih.gov/nuccore/KY688264.1">https://www.ncbi.nlm.nih.gov/nuccore/KY688264.1</a> |
| KY688248.1 |           | CA/NB/G0087/2015 | Canada        | European | <a href="https://www.ncbi.nlm.nih.gov/nuccore/KY688248.1">https://www.ncbi.nlm.nih.gov/nuccore/KY688248.1</a> |
| KY688245.1 |           | CA/NB/G0071/2015 | Canada        | European | <a href="https://www.ncbi.nlm.nih.gov/nuccore/KY688245.1">https://www.ncbi.nlm.nih.gov/nuccore/KY688245.1</a> |
| KY688244.1 |           | CA/NB/G0051/2016 | Canada        | European | <a href="https://www.ncbi.nlm.nih.gov/nuccore/KY688244.1">https://www.ncbi.nlm.nih.gov/nuccore/KY688244.1</a> |
| KY688233.1 |           | CA/NB/G0020/2015 | Canada        | European | <a href="https://www.ncbi.nlm.nih.gov/nuccore/KY688233.1">https://www.ncbi.nlm.nih.gov/nuccore/KY688233.1</a> |
| KY688231.1 |           | CA/NB/G0017/2015 | Canada        | European | <a href="https://www.ncbi.nlm.nih.gov/nuccore/KY688231.1">https://www.ncbi.nlm.nih.gov/nuccore/KY688231.1</a> |
| KY688227.1 |           | CA/NB/G0011/2016 | Canada        | European | <a href="https://www.ncbi.nlm.nih.gov/nuccore/KY688227.1">https://www.ncbi.nlm.nih.gov/nuccore/KY688227.1</a> |
| KY688258.1 |           | CA/NL/G0015/2013 | Canada        | European | <a href="https://www.ncbi.nlm.nih.gov/nuccore/KY688258.1">https://www.ncbi.nlm.nih.gov/nuccore/KY688258.1</a> |
| KX823933.1 |           | F0/144/14        | Faroe Islands |          | <a href="https://www.ncbi.nlm.nih.gov/nuccore/KX823933.1">https://www.ncbi.nlm.nih.gov/nuccore/KX823933.1</a> |
| KY688239.1 |           | CA/NB/G0046/2013 | Canada        | European | <a href="https://www.ncbi.nlm.nih.gov/nuccore/KY688239.1">https://www.ncbi.nlm.nih.gov/nuccore/KY688239.1</a> |
| KY688251.1 |           | CA/NB/G0095/2016 | Canada        | European | <a href="https://www.ncbi.nlm.nih.gov/nuccore/KY688251.1">https://www.ncbi.nlm.nih.gov/nuccore/KY688251.1</a> |
| KY688220.1 |           | CA/NB/G0004/2012 | Canada        | European | <a href="https://www.ncbi.nlm.nih.gov/nuccore/KY688220.1">https://www.ncbi.nlm.nih.gov/nuccore/KY688220.1</a> |
| KY688252.1 |           | CA/NB/G0101/2016 | Canada        | European | <a href="https://www.ncbi.nlm.nih.gov/nuccore/KY688252.1">https://www.ncbi.nlm.nih.gov/nuccore/KY688252.1</a> |

Salmon isavirus phenotype multiplex RT-qPCR

|            |      |                     |               |          |                                                                                                               |
|------------|------|---------------------|---------------|----------|---------------------------------------------------------------------------------------------------------------|
| MK125504.1 |      | NT250/18            | Norway        |          | <a href="https://www.ncbi.nlm.nih.gov/nuccore/MK125504.1">https://www.ncbi.nlm.nih.gov/nuccore/MK125504.1</a> |
| KY688271.1 |      | CA/NL/G0078/2015(B) | Canada        | European | <a href="https://www.ncbi.nlm.nih.gov/nuccore/KY688271.1">https://www.ncbi.nlm.nih.gov/nuccore/KY688271.1</a> |
| AJ440971.1 |      | 1703/01/86          | UK: Scotland  |          | <a href="https://www.ncbi.nlm.nih.gov/nuccore/AJ440971.1">https://www.ncbi.nlm.nih.gov/nuccore/AJ440971.1</a> |
| MH286492.1 |      | ST234/15            | Norway        |          | <a href="https://www.ncbi.nlm.nih.gov/nuccore/MH286492.1">https://www.ncbi.nlm.nih.gov/nuccore/MH286492.1</a> |
| MH286491.1 |      | ST207/16            | Norway        |          | <a href="https://www.ncbi.nlm.nih.gov/nuccore/MH286491.1">https://www.ncbi.nlm.nih.gov/nuccore/MH286491.1</a> |
| MH286490.1 |      | ST203/15            | Norway        |          | <a href="https://www.ncbi.nlm.nih.gov/nuccore/MH286490.1">https://www.ncbi.nlm.nih.gov/nuccore/MH286490.1</a> |
| MH286488.1 |      | NT206/15            | Norway        |          | <a href="https://www.ncbi.nlm.nih.gov/nuccore/MH286488.1">https://www.ncbi.nlm.nih.gov/nuccore/MH286488.1</a> |
| MH286487.1 |      | NT205/15            | Norway        |          | <a href="https://www.ncbi.nlm.nih.gov/nuccore/MH286487.1">https://www.ncbi.nlm.nih.gov/nuccore/MH286487.1</a> |
| MH286482.1 |      | NT197/15            | Norway        |          | <a href="https://www.ncbi.nlm.nih.gov/nuccore/MH286482.1">https://www.ncbi.nlm.nih.gov/nuccore/MH286482.1</a> |
| MH286477.1 |      | FM200b/16           | Norway        |          | <a href="https://www.ncbi.nlm.nih.gov/nuccore/MH286477.1">https://www.ncbi.nlm.nih.gov/nuccore/MH286477.1</a> |
| MH286484.1 |      | NT199/15            | Norway        |          | <a href="https://www.ncbi.nlm.nih.gov/nuccore/MH286484.1">https://www.ncbi.nlm.nih.gov/nuccore/MH286484.1</a> |
| MH286483.1 |      | NT198/15            | Norway        |          | <a href="https://www.ncbi.nlm.nih.gov/nuccore/MH286483.1">https://www.ncbi.nlm.nih.gov/nuccore/MH286483.1</a> |
| MH286481.1 |      | FM240/17            | Norway        |          | <a href="https://www.ncbi.nlm.nih.gov/nuccore/MH286481.1">https://www.ncbi.nlm.nih.gov/nuccore/MH286481.1</a> |
| MH286479.1 |      | FM202/16            | Norway        |          | <a href="https://www.ncbi.nlm.nih.gov/nuccore/MH286479.1">https://www.ncbi.nlm.nih.gov/nuccore/MH286479.1</a> |
| MH286478.1 |      | FM201/16            | Norway        |          | <a href="https://www.ncbi.nlm.nih.gov/nuccore/MH286478.1">https://www.ncbi.nlm.nih.gov/nuccore/MH286478.1</a> |
| MH286476.1 |      | FM200a/16           | Norway        |          | <a href="https://www.ncbi.nlm.nih.gov/nuccore/MH286476.1">https://www.ncbi.nlm.nih.gov/nuccore/MH286476.1</a> |
| JN711060.1 | HPR0 | FM173/11            | Norway        |          | <a href="https://www.ncbi.nlm.nih.gov/nuccore/JN711060.1">https://www.ncbi.nlm.nih.gov/nuccore/JN711060.1</a> |
| MH397883.1 |      | FM174f/11           | Norway        |          | <a href="https://www.ncbi.nlm.nih.gov/nuccore/MH397883.1">https://www.ncbi.nlm.nih.gov/nuccore/MH397883.1</a> |
| AY127881.1 |      | MR71/02             |               |          | <a href="https://www.ncbi.nlm.nih.gov/nuccore/AY127881.1">https://www.ncbi.nlm.nih.gov/nuccore/AY127881.1</a> |
| AY127877.1 |      | ST61/01             |               |          | <a href="https://www.ncbi.nlm.nih.gov/nuccore/AY127877.1">https://www.ncbi.nlm.nih.gov/nuccore/AY127877.1</a> |
| AY127878.1 |      | MR62/01             |               |          | <a href="https://www.ncbi.nlm.nih.gov/nuccore/AY127878.1">https://www.ncbi.nlm.nih.gov/nuccore/AY127878.1</a> |
| FJ786978.1 |      | 26560-10b           | Chile         |          | <a href="https://www.ncbi.nlm.nih.gov/nuccore/FJ786978.1">https://www.ncbi.nlm.nih.gov/nuccore/FJ786978.1</a> |
| FJ594296.1 |      | Biovac32325-4       | Chile         |          | <a href="https://www.ncbi.nlm.nih.gov/nuccore/FJ594296.1">https://www.ncbi.nlm.nih.gov/nuccore/FJ594296.1</a> |
| KR998476.1 |      | VT03282012-222-C    | Canada        |          | <a href="https://www.ncbi.nlm.nih.gov/nuccore/KR998476.1">https://www.ncbi.nlm.nih.gov/nuccore/KR998476.1</a> |
| JQ857080.1 |      | VT02142012-90       | Canada        | European | <a href="https://www.ncbi.nlm.nih.gov/nuccore/JQ857080.1">https://www.ncbi.nlm.nih.gov/nuccore/JQ857080.1</a> |
| FJ594286.1 |      | Biovac31687-3       | Chile         |          | <a href="https://www.ncbi.nlm.nih.gov/nuccore/FJ594286.1">https://www.ncbi.nlm.nih.gov/nuccore/FJ594286.1</a> |
| FJ594287.1 |      | Biovac31687-5       | Chile         |          | <a href="https://www.ncbi.nlm.nih.gov/nuccore/FJ594287.1">https://www.ncbi.nlm.nih.gov/nuccore/FJ594287.1</a> |
| MF314020.1 |      | GIM-16414           | Chile         |          | <a href="https://www.ncbi.nlm.nih.gov/nuccore/MF314020.1">https://www.ncbi.nlm.nih.gov/nuccore/MF314020.1</a> |
| FJ594297.1 |      | Biovac30740-3       | Chile         |          | <a href="https://www.ncbi.nlm.nih.gov/nuccore/FJ594297.1">https://www.ncbi.nlm.nih.gov/nuccore/FJ594297.1</a> |
| KX823931.1 |      | F0/95b/14           | Faroe Islands |          | <a href="https://www.ncbi.nlm.nih.gov/nuccore/KX823931.1">https://www.ncbi.nlm.nih.gov/nuccore/KX823931.1</a> |



Salmon isavirus phenotype multiplex RT-qPCR

|            |                      |                  |                       |          |                                                                                                               |
|------------|----------------------|------------------|-----------------------|----------|---------------------------------------------------------------------------------------------------------------|
| FN687353.1 | AR9/08 HPR0 genotype |                  | Norway                |          | <a href="https://www.ncbi.nlm.nih.gov/nuccore/FN687353.1">https://www.ncbi.nlm.nih.gov/nuccore/FN687353.1</a> |
| MH397888.1 |                      | FM174m/11        | Norway                |          | <a href="https://www.ncbi.nlm.nih.gov/nuccore/MH397888.1">https://www.ncbi.nlm.nih.gov/nuccore/MH397888.1</a> |
| MH397882.1 |                      | Fm174e/11        | Norway                |          | <a href="https://www.ncbi.nlm.nih.gov/nuccore/MH397882.1">https://www.ncbi.nlm.nih.gov/nuccore/MH397882.1</a> |
| MH397880.1 |                      | FM174c/11        | Norway                |          | <a href="https://www.ncbi.nlm.nih.gov/nuccore/MH397880.1">https://www.ncbi.nlm.nih.gov/nuccore/MH397880.1</a> |
| MH286489.1 |                      | NT242/16         | Norway                |          | <a href="https://www.ncbi.nlm.nih.gov/nuccore/MH286489.1">https://www.ncbi.nlm.nih.gov/nuccore/MH286489.1</a> |
| MH286480.1 |                      | FM237/17         | Norway                |          | <a href="https://www.ncbi.nlm.nih.gov/nuccore/MH286480.1">https://www.ncbi.nlm.nih.gov/nuccore/MH286480.1</a> |
| KX823929.1 |                      | F0/570/12        | Faroe Islands         |          | <a href="https://www.ncbi.nlm.nih.gov/nuccore/KX823929.1">https://www.ncbi.nlm.nih.gov/nuccore/KX823929.1</a> |
| KX823928.1 |                      | F0/455/11        | Faroe Islands         |          | <a href="https://www.ncbi.nlm.nih.gov/nuccore/KX823928.1">https://www.ncbi.nlm.nih.gov/nuccore/KX823928.1</a> |
| KX823927.1 |                      | F0/452/11        | Faroe Islands         |          | <a href="https://www.ncbi.nlm.nih.gov/nuccore/KX823927.1">https://www.ncbi.nlm.nih.gov/nuccore/KX823927.1</a> |
| MH286486.1 |                      | NT204b/15        | Norway                |          | <a href="https://www.ncbi.nlm.nih.gov/nuccore/MH286486.1">https://www.ncbi.nlm.nih.gov/nuccore/MH286486.1</a> |
| FJ178189.1 |                      | NWM10            | UK                    |          | <a href="https://www.ncbi.nlm.nih.gov/nuccore/FJ178189.1">https://www.ncbi.nlm.nih.gov/nuccore/FJ178189.1</a> |
| AY601904.1 |                      | NS 7166-03       | Canada: Nova Scotia   |          | <a href="https://www.ncbi.nlm.nih.gov/nuccore/AY601904.1">https://www.ncbi.nlm.nih.gov/nuccore/AY601904.1</a> |
| AF294881.2 |                      | U5575-1          | Canada                |          | <a href="https://www.ncbi.nlm.nih.gov/nuccore/AF294881.2">https://www.ncbi.nlm.nih.gov/nuccore/AF294881.2</a> |
| KY688274.1 |                      | CA/NS/G0018/2012 | Canada                | European | <a href="https://www.ncbi.nlm.nih.gov/nuccore/KY688274.1">https://www.ncbi.nlm.nih.gov/nuccore/KY688274.1</a> |
| KY688273.1 |                      | CA/NS/G0017/2014 | Canada                | European | <a href="https://www.ncbi.nlm.nih.gov/nuccore/KY688273.1">https://www.ncbi.nlm.nih.gov/nuccore/KY688273.1</a> |
| KY688238.1 |                      | CA/NB/G0045/2013 | Canada                | European | <a href="https://www.ncbi.nlm.nih.gov/nuccore/KY688238.1">https://www.ncbi.nlm.nih.gov/nuccore/KY688238.1</a> |
| KY688249.1 |                      | CA/NB/G0089/2016 | Canada                | European | <a href="https://www.ncbi.nlm.nih.gov/nuccore/KY688249.1">https://www.ncbi.nlm.nih.gov/nuccore/KY688249.1</a> |
| KY688235.1 |                      | CA/NB/G0029/2013 | Canada                | European | <a href="https://www.ncbi.nlm.nih.gov/nuccore/KY688235.1">https://www.ncbi.nlm.nih.gov/nuccore/KY688235.1</a> |
| KY688226.1 |                      | CA/NB/G011/2015  | Canada                | European | <a href="https://www.ncbi.nlm.nih.gov/nuccore/KY688226.1">https://www.ncbi.nlm.nih.gov/nuccore/KY688226.1</a> |
| KY688225.1 |                      | CA/NB/G0010/2016 | Canada                | European | <a href="https://www.ncbi.nlm.nih.gov/nuccore/KY688225.1">https://www.ncbi.nlm.nih.gov/nuccore/KY688225.1</a> |
| KY688222.1 |                      | CA/NB/G0008/2015 | Canada                | European | <a href="https://www.ncbi.nlm.nih.gov/nuccore/KY688222.1">https://www.ncbi.nlm.nih.gov/nuccore/KY688222.1</a> |
| KY688247.1 |                      | CA/NB/G0085/2015 | Canada                | European | <a href="https://www.ncbi.nlm.nih.gov/nuccore/KY688247.1">https://www.ncbi.nlm.nih.gov/nuccore/KY688247.1</a> |
| KY688232.1 |                      | CA/NB/G0018/2014 | Canada                | European | <a href="https://www.ncbi.nlm.nih.gov/nuccore/KY688232.1">https://www.ncbi.nlm.nih.gov/nuccore/KY688232.1</a> |
| KY688242.1 |                      | CA/NB/G0050/2016 | Canada                | European | <a href="https://www.ncbi.nlm.nih.gov/nuccore/KY688242.1">https://www.ncbi.nlm.nih.gov/nuccore/KY688242.1</a> |
| KY688219.1 |                      | CA/NB/G003/2014  | Canada                | European | <a href="https://www.ncbi.nlm.nih.gov/nuccore/KY688219.1">https://www.ncbi.nlm.nih.gov/nuccore/KY688219.1</a> |
| AY151813.1 |                      | Nova Scotia      | Canada                |          | <a href="https://www.ncbi.nlm.nih.gov/nuccore/AY151813.1">https://www.ncbi.nlm.nih.gov/nuccore/AY151813.1</a> |
| AY646062.1 |                      | NB753-2          | Canada: New Brunswick |          | <a href="https://www.ncbi.nlm.nih.gov/nuccore/AY646062.1">https://www.ncbi.nlm.nih.gov/nuccore/AY646062.1</a> |
| JN711062.1 |                      | FM174b/11        | Norway                |          | <a href="https://www.ncbi.nlm.nih.gov/nuccore/JN711062.1">https://www.ncbi.nlm.nih.gov/nuccore/JN711062.1</a> |
| MH397886.1 |                      | FM174j/11        | Norway                |          | <a href="https://www.ncbi.nlm.nih.gov/nuccore/MH397886.1">https://www.ncbi.nlm.nih.gov/nuccore/MH397886.1</a> |
| MH397885.1 |                      | FM174i/11        | Norway                |          | <a href="https://www.ncbi.nlm.nih.gov/nuccore/MH397885.1">https://www.ncbi.nlm.nih.gov/nuccore/MH397885.1</a> |



Salmon isavirus phenotype multiplex RT-qPCR

|            |                      |             |        |                                                                                                               |
|------------|----------------------|-------------|--------|---------------------------------------------------------------------------------------------------------------|
| JN711086.1 |                      | T152/09     | Norway | <a href="https://www.ncbi.nlm.nih.gov/nuccore/JN711086.1">https://www.ncbi.nlm.nih.gov/nuccore/JN711086.1</a> |
| JN711080.1 |                      | T144/08     | Norway | <a href="https://www.ncbi.nlm.nih.gov/nuccore/JN711080.1">https://www.ncbi.nlm.nih.gov/nuccore/JN711080.1</a> |
| FN687328.1 | ISA13/08-2           |             | Norway | <a href="https://www.ncbi.nlm.nih.gov/nuccore/FN687328.1">https://www.ncbi.nlm.nih.gov/nuccore/FN687328.1</a> |
| FN687327.1 | ISA13/08-1           |             | Norway | <a href="https://www.ncbi.nlm.nih.gov/nuccore/FN687327.1">https://www.ncbi.nlm.nih.gov/nuccore/FN687327.1</a> |
| FJ594284.1 |                      | 13364-2006B | Chile  | <a href="https://www.ncbi.nlm.nih.gov/nuccore/FJ594284.1">https://www.ncbi.nlm.nih.gov/nuccore/FJ594284.1</a> |
| MH986019.1 |                      | H248/18     | Norway | <a href="https://www.ncbi.nlm.nih.gov/nuccore/MH986019.1">https://www.ncbi.nlm.nih.gov/nuccore/MH986019.1</a> |
| JN711085.1 |                      | T151/08     | Norway | <a href="https://www.ncbi.nlm.nih.gov/nuccore/JN711085.1">https://www.ncbi.nlm.nih.gov/nuccore/JN711085.1</a> |
| FN687293.1 | ISA5/07-2            |             | Norway | <a href="https://www.ncbi.nlm.nih.gov/nuccore/FN687293.1">https://www.ncbi.nlm.nih.gov/nuccore/FN687293.1</a> |
| FN687288.1 | ISA3/07-1            |             | Norway | <a href="https://www.ncbi.nlm.nih.gov/nuccore/FN687288.1">https://www.ncbi.nlm.nih.gov/nuccore/FN687288.1</a> |
| FN687324.1 | ISA11/08-2           |             | Norway | <a href="https://www.ncbi.nlm.nih.gov/nuccore/FN687324.1">https://www.ncbi.nlm.nih.gov/nuccore/FN687324.1</a> |
| FN687323.1 | ISA11/08-1           |             | Norway | <a href="https://www.ncbi.nlm.nih.gov/nuccore/FN687323.1">https://www.ncbi.nlm.nih.gov/nuccore/FN687323.1</a> |
| FN687296.1 | ISA6/07-3            |             | Norway | <a href="https://www.ncbi.nlm.nih.gov/nuccore/FN687296.1">https://www.ncbi.nlm.nih.gov/nuccore/FN687296.1</a> |
| FN687298.1 | ISA6/07-5            |             | Norway | <a href="https://www.ncbi.nlm.nih.gov/nuccore/FN687298.1">https://www.ncbi.nlm.nih.gov/nuccore/FN687298.1</a> |
| FN687297.1 | ISA6/07-4            |             | Norway | <a href="https://www.ncbi.nlm.nih.gov/nuccore/FN687297.1">https://www.ncbi.nlm.nih.gov/nuccore/FN687297.1</a> |
| FN687295.1 | ISA6/07-2            |             | Norway | <a href="https://www.ncbi.nlm.nih.gov/nuccore/FN687295.1">https://www.ncbi.nlm.nih.gov/nuccore/FN687295.1</a> |
| FN687334.1 | ISA1/09-1            |             | Norway | <a href="https://www.ncbi.nlm.nih.gov/nuccore/FN687334.1">https://www.ncbi.nlm.nih.gov/nuccore/FN687334.1</a> |
| FN687337.1 | ISA2/09-2            |             | Norway | <a href="https://www.ncbi.nlm.nih.gov/nuccore/FN687337.1">https://www.ncbi.nlm.nih.gov/nuccore/FN687337.1</a> |
| FN687336.1 | ISA2/09-1            |             | Norway | <a href="https://www.ncbi.nlm.nih.gov/nuccore/FN687336.1">https://www.ncbi.nlm.nih.gov/nuccore/FN687336.1</a> |
| FN687289.1 | ISA3/007-2           |             | Norway | <a href="https://www.ncbi.nlm.nih.gov/nuccore/FN687289.1">https://www.ncbi.nlm.nih.gov/nuccore/FN687289.1</a> |
| FN687292.1 | ISA5/07-1            |             | Norway | <a href="https://www.ncbi.nlm.nih.gov/nuccore/FN687292.1">https://www.ncbi.nlm.nih.gov/nuccore/FN687292.1</a> |
| FN687300.1 | ISA6/07-7            |             | Norway | <a href="https://www.ncbi.nlm.nih.gov/nuccore/FN687300.1">https://www.ncbi.nlm.nih.gov/nuccore/FN687300.1</a> |
| FN687302.1 | ISA6/07-2            |             | Norway | <a href="https://www.ncbi.nlm.nih.gov/nuccore/FN687302.1">https://www.ncbi.nlm.nih.gov/nuccore/FN687302.1</a> |
| FN687299.1 | ISA6/07-6            |             | Norway | <a href="https://www.ncbi.nlm.nih.gov/nuccore/FN687299.1">https://www.ncbi.nlm.nih.gov/nuccore/FN687299.1</a> |
| FN687351.1 | AR7/08 HPR0 genotype |             | Norway | <a href="https://www.ncbi.nlm.nih.gov/nuccore/FN687351.1">https://www.ncbi.nlm.nih.gov/nuccore/FN687351.1</a> |
| FN687350.1 | AR5/08 HPR0 genotype |             | Norway | <a href="https://www.ncbi.nlm.nih.gov/nuccore/FN687350.1">https://www.ncbi.nlm.nih.gov/nuccore/FN687350.1</a> |
| JN711059.1 |                      | FM168/19    | Norway | <a href="https://www.ncbi.nlm.nih.gov/nuccore/JN711059.1">https://www.ncbi.nlm.nih.gov/nuccore/JN711059.1</a> |
| MH397881.1 |                      | FM174d/11   | Norway | <a href="https://www.ncbi.nlm.nih.gov/nuccore/MH397881.1">https://www.ncbi.nlm.nih.gov/nuccore/MH397881.1</a> |
| HE800177.1 | ISA4 10B             |             | Norway | <a href="https://www.ncbi.nlm.nih.gov/nuccore/HE800177.1">https://www.ncbi.nlm.nih.gov/nuccore/HE800177.1</a> |
| HE800176.1 | ISA4 10A             |             | Norway | <a href="https://www.ncbi.nlm.nih.gov/nuccore/HE800176.1">https://www.ncbi.nlm.nih.gov/nuccore/HE800176.1</a> |
| MH397884.1 |                      | FM174g/11   | Norway | <a href="https://www.ncbi.nlm.nih.gov/nuccore/MH397884.1">https://www.ncbi.nlm.nih.gov/nuccore/MH397884.1</a> |

Salmon isavirus phenotype multiplex RT-qPCR

|            |            |                 |        |                                                                                                               |
|------------|------------|-----------------|--------|---------------------------------------------------------------------------------------------------------------|
| MH397887.1 |            | FM174k/11       | Norway | <a href="https://www.ncbi.nlm.nih.gov/nuccore/MH397887.1">https://www.ncbi.nlm.nih.gov/nuccore/MH397887.1</a> |
| JN711061.1 |            | FM174a/11       | Norway | <a href="https://www.ncbi.nlm.nih.gov/nuccore/JN711061.1">https://www.ncbi.nlm.nih.gov/nuccore/JN711061.1</a> |
| MH397889.1 |            | FM174n/11       | Norway | <a href="https://www.ncbi.nlm.nih.gov/nuccore/MH397889.1">https://www.ncbi.nlm.nih.gov/nuccore/MH397889.1</a> |
| JN711092.1 |            | T167/10         | Norway | <a href="https://www.ncbi.nlm.nih.gov/nuccore/JN711092.1">https://www.ncbi.nlm.nih.gov/nuccore/JN711092.1</a> |
| JN711088.1 |            | Y158/09         | Norway | <a href="https://www.ncbi.nlm.nih.gov/nuccore/JN711088.1">https://www.ncbi.nlm.nih.gov/nuccore/JN711088.1</a> |
| JN711089.1 |            | T169/09         | Norway | <a href="https://www.ncbi.nlm.nih.gov/nuccore/JN711089.1">https://www.ncbi.nlm.nih.gov/nuccore/JN711089.1</a> |
| JN711087.1 |            | T154/09         | Norway | <a href="https://www.ncbi.nlm.nih.gov/nuccore/JN711087.1">https://www.ncbi.nlm.nih.gov/nuccore/JN711087.1</a> |
| JN711084.1 |            | T149/08         | Norway | <a href="https://www.ncbi.nlm.nih.gov/nuccore/JN711084.1">https://www.ncbi.nlm.nih.gov/nuccore/JN711084.1</a> |
| JN711082.1 |            | T147/08         | Norway | <a href="https://www.ncbi.nlm.nih.gov/nuccore/JN711082.1">https://www.ncbi.nlm.nih.gov/nuccore/JN711082.1</a> |
| JN711081.1 |            | T145/08         | Norway | <a href="https://www.ncbi.nlm.nih.gov/nuccore/JN711081.1">https://www.ncbi.nlm.nih.gov/nuccore/JN711081.1</a> |
| JN711079.1 |            | T140/08         | Norway | <a href="https://www.ncbi.nlm.nih.gov/nuccore/JN711079.1">https://www.ncbi.nlm.nih.gov/nuccore/JN711079.1</a> |
| FN687325.1 | ISA12/08-1 |                 | Norway | <a href="https://www.ncbi.nlm.nih.gov/nuccore/FN687325.1">https://www.ncbi.nlm.nih.gov/nuccore/FN687325.1</a> |
| FN687322.1 | ISA10/08-2 |                 | Norway | <a href="https://www.ncbi.nlm.nih.gov/nuccore/FN687322.1">https://www.ncbi.nlm.nih.gov/nuccore/FN687322.1</a> |
| FN687321.1 | ISA10/08-1 |                 | Norway | <a href="https://www.ncbi.nlm.nih.gov/nuccore/FN687321.1">https://www.ncbi.nlm.nih.gov/nuccore/FN687321.1</a> |
| FN687326.1 | ISA12/08-2 |                 | Norway | <a href="https://www.ncbi.nlm.nih.gov/nuccore/FN687326.1">https://www.ncbi.nlm.nih.gov/nuccore/FN687326.1</a> |
| FN687339.1 | ISA3/09-2  |                 | Norway | <a href="https://www.ncbi.nlm.nih.gov/nuccore/FN687339.1">https://www.ncbi.nlm.nih.gov/nuccore/FN687339.1</a> |
| FN687345.1 | ISA6/09-2  |                 | Norway | <a href="https://www.ncbi.nlm.nih.gov/nuccore/FN687345.1">https://www.ncbi.nlm.nih.gov/nuccore/FN687345.1</a> |
| FN687346.1 | ISA7/09-1  |                 | Norway | <a href="https://www.ncbi.nlm.nih.gov/nuccore/FN687346.1">https://www.ncbi.nlm.nih.gov/nuccore/FN687346.1</a> |
| FN687349.1 | AR3/08     |                 | Norway | <a href="https://www.ncbi.nlm.nih.gov/nuccore/FN687349.1">https://www.ncbi.nlm.nih.gov/nuccore/FN687349.1</a> |
| FN687301.1 | ISA6/07-8  |                 | Norway | <a href="https://www.ncbi.nlm.nih.gov/nuccore/FN687301.1">https://www.ncbi.nlm.nih.gov/nuccore/FN687301.1</a> |
| FN687338.1 | ISA3/09-1  |                 | Norway | <a href="https://www.ncbi.nlm.nih.gov/nuccore/FN687338.1">https://www.ncbi.nlm.nih.gov/nuccore/FN687338.1</a> |
| FN687306.1 | ISA2/08-1  |                 | Norway | <a href="https://www.ncbi.nlm.nih.gov/nuccore/FN687306.1">https://www.ncbi.nlm.nih.gov/nuccore/FN687306.1</a> |
| FN687330.1 | ISA14/08-2 |                 | Norway | <a href="https://www.ncbi.nlm.nih.gov/nuccore/FN687330.1">https://www.ncbi.nlm.nih.gov/nuccore/FN687330.1</a> |
| KC907293.1 | OBK        | OBK3s6          | Norway | <a href="https://www.ncbi.nlm.nih.gov/nuccore/KC907293.1">https://www.ncbi.nlm.nih.gov/nuccore/KC907293.1</a> |
| FN687343.1 | ISA5/09-2  |                 | Norway | <a href="https://www.ncbi.nlm.nih.gov/nuccore/FN687343.1">https://www.ncbi.nlm.nih.gov/nuccore/FN687343.1</a> |
| KJ563139.1 |            | GIM-17600       | Chile  | <a href="https://www.ncbi.nlm.nih.gov/nuccore/KJ563139.1">https://www.ncbi.nlm.nih.gov/nuccore/KJ563139.1</a> |
| MF314035.1 |            | GIM-17906       | Chile  | <a href="https://www.ncbi.nlm.nih.gov/nuccore/MF314035.1">https://www.ncbi.nlm.nih.gov/nuccore/MF314035.1</a> |
| MF314034.1 |            | GIM-17904       | Chile  | <a href="https://www.ncbi.nlm.nih.gov/nuccore/MF314034.1">https://www.ncbi.nlm.nih.gov/nuccore/MF314034.1</a> |
| MF314006.1 |            | GIM_HPR7a       | Chile  | <a href="https://www.ncbi.nlm.nih.gov/nuccore/MF314006.1">https://www.ncbi.nlm.nih.gov/nuccore/MF314006.1</a> |
| KR998478.1 |            | VT05252012-337G | Canada | <a href="https://www.ncbi.nlm.nih.gov/nuccore/KR998478.1">https://www.ncbi.nlm.nih.gov/nuccore/KR998478.1</a> |

Salmon isavirus phenotype multiplex RT-qPCR

|            |               |                  |        |          |                                                                                                               |
|------------|---------------|------------------|--------|----------|---------------------------------------------------------------------------------------------------------------|
| KR998474.1 |               | VT05252012-336G  | Canada |          | <a href="https://www.ncbi.nlm.nih.gov/nuccore/KR998474.1">https://www.ncbi.nlm.nih.gov/nuccore/KR998474.1</a> |
| AF378179.1 |               | 835/9/98         | Norway |          | <a href="https://www.ncbi.nlm.nih.gov/nuccore/AF378179.1">https://www.ncbi.nlm.nih.gov/nuccore/AF378179.1</a> |
| AF378180.2 |               | 810/9/99         | Norway |          | <a href="https://www.ncbi.nlm.nih.gov/nuccore/AF378180.2">https://www.ncbi.nlm.nih.gov/nuccore/AF378180.2</a> |
| DQ118254.1 |               | T85B/04          | Norway |          | <a href="https://www.ncbi.nlm.nih.gov/nuccore/DQ118254.1">https://www.ncbi.nlm.nih.gov/nuccore/DQ118254.1</a> |
| EF105373.1 |               | ILA36            | Norway | European | <a href="https://www.ncbi.nlm.nih.gov/nuccore/EF105373.1">https://www.ncbi.nlm.nih.gov/nuccore/EF105373.1</a> |
| AF302799.1 |               | Bremnes/98       | Norway |          | <a href="https://www.ncbi.nlm.nih.gov/nuccore/AF302799.1">https://www.ncbi.nlm.nih.gov/nuccore/AF302799.1</a> |
| DQ118255.1 |               | SF113/04         | Norway |          | <a href="https://www.ncbi.nlm.nih.gov/nuccore/DQ118255.1">https://www.ncbi.nlm.nih.gov/nuccore/DQ118255.1</a> |
| FN687318.1 | ISA8/08       |                  | Norway |          | <a href="https://www.ncbi.nlm.nih.gov/nuccore/FN687318.1">https://www.ncbi.nlm.nih.gov/nuccore/FN687318.1</a> |
| DQ785257.1 |               | Vir28(94/09/579) | Norway |          | <a href="https://www.ncbi.nlm.nih.gov/nuccore/DQ785257.1">https://www.ncbi.nlm.nih.gov/nuccore/DQ785257.1</a> |
| FR751551.1 | 200603B       |                  | Norway |          | <a href="https://www.ncbi.nlm.nih.gov/nuccore/FR751551.1">https://www.ncbi.nlm.nih.gov/nuccore/FR751551.1</a> |
| FR751550.1 | 200603B       |                  | Norway |          | <a href="https://www.ncbi.nlm.nih.gov/nuccore/FR751550.1">https://www.ncbi.nlm.nih.gov/nuccore/FR751550.1</a> |
| KR998475.1 |               | VT08092012-449   | Canada |          | <a href="https://www.ncbi.nlm.nih.gov/nuccore/KR998475.1">https://www.ncbi.nlm.nih.gov/nuccore/KR998475.1</a> |
| FN687285.1 | ISA1/07-2     |                  | Norway |          | <a href="https://www.ncbi.nlm.nih.gov/nuccore/FN687285.1">https://www.ncbi.nlm.nih.gov/nuccore/FN687285.1</a> |
| KR998479.1 |               | VT12212012-1068  | Canada |          | <a href="https://www.ncbi.nlm.nih.gov/nuccore/KR998479.1">https://www.ncbi.nlm.nih.gov/nuccore/KR998479.1</a> |
| HE800158.1 | SC5 10        |                  | Norway |          | <a href="https://www.ncbi.nlm.nih.gov/nuccore/HE800158.1">https://www.ncbi.nlm.nih.gov/nuccore/HE800158.1</a> |
| JQ857079.1 |               | VT02142012-52    | Canada | European | <a href="https://www.ncbi.nlm.nih.gov/nuccore/JQ857079.1">https://www.ncbi.nlm.nih.gov/nuccore/JQ857079.1</a> |
| FR796472.1 | ISA8_09-2     |                  | Norway |          | <a href="https://www.ncbi.nlm.nih.gov/nuccore/FR796472.1">https://www.ncbi.nlm.nih.gov/nuccore/FR796472.1</a> |
| FR796471.1 | ISA8_09-1     |                  | Norway |          | <a href="https://www.ncbi.nlm.nih.gov/nuccore/FR796471.1">https://www.ncbi.nlm.nih.gov/nuccore/FR796471.1</a> |
| KR998477.1 |               | VT03282012-222-E | Canada |          | <a href="https://www.ncbi.nlm.nih.gov/nuccore/KR998477.1">https://www.ncbi.nlm.nih.gov/nuccore/KR998477.1</a> |
| MH397912.1 |               | R171/07          | Norway |          | <a href="https://www.ncbi.nlm.nih.gov/nuccore/MH397912.1">https://www.ncbi.nlm.nih.gov/nuccore/MH397912.1</a> |
| JQ857081.1 |               | CT02142012-120   | Canada |          | <a href="https://www.ncbi.nlm.nih.gov/nuccore/JQ857081.1">https://www.ncbi.nlm.nih.gov/nuccore/JQ857081.1</a> |
| FJ786988.1 |               | 32246            | Chile  |          | <a href="https://www.ncbi.nlm.nih.gov/nuccore/FJ786988.1">https://www.ncbi.nlm.nih.gov/nuccore/FJ786988.1</a> |
| FJ594292.1 |               | Biovac30942/943  | Chile  |          | <a href="https://www.ncbi.nlm.nih.gov/nuccore/FJ594292.1">https://www.ncbi.nlm.nih.gov/nuccore/FJ594292.1</a> |
| EU625666.1 | VT11282007-35 | Biovac 26560-10  | Chile  | European | <a href="https://www.ncbi.nlm.nih.gov/nuccore/EU625666.1">https://www.ncbi.nlm.nih.gov/nuccore/EU625666.1</a> |
| EU625667.1 | VT11282007-38 | Biovac 26936-1   | Chile  | European | <a href="https://www.ncbi.nlm.nih.gov/nuccore/EU625667.1">https://www.ncbi.nlm.nih.gov/nuccore/EU625667.1</a> |
| MF325015.1 |               | GIM-21310        | Chile  |          | <a href="https://www.ncbi.nlm.nih.gov/nuccore/MF325015.1">https://www.ncbi.nlm.nih.gov/nuccore/MF325015.1</a> |
| MH397920.1 |               | SF210a/15        | Norway |          | <a href="https://www.ncbi.nlm.nih.gov/nuccore/MH397920.1">https://www.ncbi.nlm.nih.gov/nuccore/MH397920.1</a> |
| JN711078.1 |               | T131/07          | Norway |          | <a href="https://www.ncbi.nlm.nih.gov/nuccore/JN711078.1">https://www.ncbi.nlm.nih.gov/nuccore/JN711078.1</a> |
| MF314047.1 |               | GIM-20064        | Chile  |          | <a href="https://www.ncbi.nlm.nih.gov/nuccore/MF314047.1">https://www.ncbi.nlm.nih.gov/nuccore/MF314047.1</a> |
| MF314011.1 |               | GIM-20034        | Chile  |          | <a href="https://www.ncbi.nlm.nih.gov/nuccore/MF314011.1">https://www.ncbi.nlm.nih.gov/nuccore/MF314011.1</a> |

Salmon isavirus phenotype multiplex RT-qPCR

|            |           |                   |        |          |                                                                                                               |
|------------|-----------|-------------------|--------|----------|---------------------------------------------------------------------------------------------------------------|
| MF314012.1 |           | GIM-13552         | Chile  |          | <a href="https://www.ncbi.nlm.nih.gov/nuccore/MF314012.1">https://www.ncbi.nlm.nih.gov/nuccore/MF314012.1</a> |
| JN711093.1 |           | CH05/08           | Chile  |          | <a href="https://www.ncbi.nlm.nih.gov/nuccore/JN711093.1">https://www.ncbi.nlm.nih.gov/nuccore/JN711093.1</a> |
| MF314046.1 |           | GIM-19962         | Chile  |          | <a href="https://www.ncbi.nlm.nih.gov/nuccore/MF314046.1">https://www.ncbi.nlm.nih.gov/nuccore/MF314046.1</a> |
| MF314044.1 |           | GIM-19958         | Chile  |          | <a href="https://www.ncbi.nlm.nih.gov/nuccore/MF314044.1">https://www.ncbi.nlm.nih.gov/nuccore/MF314044.1</a> |
| MF314045.1 |           | GIM-19960         | Chile  |          | <a href="https://www.ncbi.nlm.nih.gov/nuccore/MF314045.1">https://www.ncbi.nlm.nih.gov/nuccore/MF314045.1</a> |
| DQ785250.1 |           | ISAV6(96/09/734)  | Norway |          | <a href="https://www.ncbi.nlm.nih.gov/nuccore/DQ785250.1">https://www.ncbi.nlm.nih.gov/nuccore/DQ785250.1</a> |
| FN687304.1 | ISA7/07-2 |                   | Norway |          | <a href="https://www.ncbi.nlm.nih.gov/nuccore/FN687304.1">https://www.ncbi.nlm.nih.gov/nuccore/FN687304.1</a> |
| FN687303.1 | ISA7/07-1 |                   | Norway |          | <a href="https://www.ncbi.nlm.nih.gov/nuccore/FN687303.1">https://www.ncbi.nlm.nih.gov/nuccore/FN687303.1</a> |
| DQ785251.1 |           | ISAV7(96/09/1729) | Norway |          | <a href="https://www.ncbi.nlm.nih.gov/nuccore/DQ785251.1">https://www.ncbi.nlm.nih.gov/nuccore/DQ785251.1</a> |
| FJ786974.1 |           | 30735-2c          | Chile  |          | <a href="https://www.ncbi.nlm.nih.gov/nuccore/FJ786974.1">https://www.ncbi.nlm.nih.gov/nuccore/FJ786974.1</a> |
| MF325013.1 |           | GIM-21038         | Chile  |          | <a href="https://www.ncbi.nlm.nih.gov/nuccore/MF325013.1">https://www.ncbi.nlm.nih.gov/nuccore/MF325013.1</a> |
| MF325012.1 |           | GIM-21036         | Chile  |          | <a href="https://www.ncbi.nlm.nih.gov/nuccore/MF325012.1">https://www.ncbi.nlm.nih.gov/nuccore/MF325012.1</a> |
| FJ786970.1 |           | 26416-6           | Chile  |          | <a href="https://www.ncbi.nlm.nih.gov/nuccore/FJ786970.1">https://www.ncbi.nlm.nih.gov/nuccore/FJ786970.1</a> |
| FJ594285.1 |           | Biovac33004-2     | Chile  |          | <a href="https://www.ncbi.nlm.nih.gov/nuccore/FJ594285.1">https://www.ncbi.nlm.nih.gov/nuccore/FJ594285.1</a> |
| KF386112.1 |           | CGA/3016-3        | Chile  |          | <a href="https://www.ncbi.nlm.nih.gov/nuccore/KF386112.1">https://www.ncbi.nlm.nih.gov/nuccore/KF386112.1</a> |
| KF373265.1 |           | CGA/3688-2        | Chile  |          | <a href="https://www.ncbi.nlm.nih.gov/nuccore/KF373265.1">https://www.ncbi.nlm.nih.gov/nuccore/KF373265.1</a> |
| KF373257.1 |           | CGA/3016-3        | Chile  | European | <a href="https://www.ncbi.nlm.nih.gov/nuccore/KF373257.1">https://www.ncbi.nlm.nih.gov/nuccore/KF373257.1</a> |
| KF051892.1 |           | CGA/Ch78-14       | Chile  | European | <a href="https://www.ncbi.nlm.nih.gov/nuccore/KF051892.1">https://www.ncbi.nlm.nih.gov/nuccore/KF051892.1</a> |
| KF051891.1 |           | CGA/Ch78-12       | Chile  | European | <a href="https://www.ncbi.nlm.nih.gov/nuccore/KF051891.1">https://www.ncbi.nlm.nih.gov/nuccore/KF051891.1</a> |
| KF051883.1 |           | CGA/Ch78-2        | Chile  | European | <a href="https://www.ncbi.nlm.nih.gov/nuccore/KF051883.1">https://www.ncbi.nlm.nih.gov/nuccore/KF051883.1</a> |
| KF051880.1 |           | CGA/Ch77-17       | Chile  | European | <a href="https://www.ncbi.nlm.nih.gov/nuccore/KF051880.1">https://www.ncbi.nlm.nih.gov/nuccore/KF051880.1</a> |
| KF051886.1 |           | CGA/Ch78-6        | Chile  | European | <a href="https://www.ncbi.nlm.nih.gov/nuccore/KF051886.1">https://www.ncbi.nlm.nih.gov/nuccore/KF051886.1</a> |
| KF051900.1 |           | CGA/Ch87-33       | Chile  | European | <a href="https://www.ncbi.nlm.nih.gov/nuccore/KF051900.1">https://www.ncbi.nlm.nih.gov/nuccore/KF051900.1</a> |
| KF051887.1 |           | CGA/Ch78-7        | Chile  | European | <a href="https://www.ncbi.nlm.nih.gov/nuccore/KF051887.1">https://www.ncbi.nlm.nih.gov/nuccore/KF051887.1</a> |
| KF051897.1 |           | CGA/Ch87-27       | Chile  | European | <a href="https://www.ncbi.nlm.nih.gov/nuccore/KF051897.1">https://www.ncbi.nlm.nih.gov/nuccore/KF051897.1</a> |
| KF051893.1 |           | CGA/Ch78-15       | Chile  | European | <a href="https://www.ncbi.nlm.nih.gov/nuccore/KF051893.1">https://www.ncbi.nlm.nih.gov/nuccore/KF051893.1</a> |
| KF051895.1 |           | CGA/Ch78-17       | Chile  | European | <a href="https://www.ncbi.nlm.nih.gov/nuccore/KF051895.1">https://www.ncbi.nlm.nih.gov/nuccore/KF051895.1</a> |
| KF051885.1 |           | CGA/Ch78-5        | Chile  | European | <a href="https://www.ncbi.nlm.nih.gov/nuccore/KF051885.1">https://www.ncbi.nlm.nih.gov/nuccore/KF051885.1</a> |
| KF051873.1 |           | CGA/Ch26-8        | Chile  | European | <a href="https://www.ncbi.nlm.nih.gov/nuccore/KF051873.1">https://www.ncbi.nlm.nih.gov/nuccore/KF051873.1</a> |
| KF051881.1 |           | CGA/Ch77-18       | Chile  | European | <a href="https://www.ncbi.nlm.nih.gov/nuccore/KF051881.1">https://www.ncbi.nlm.nih.gov/nuccore/KF051881.1</a> |

Salmon isavirus phenotype multiplex RT-qPCR

|            |         |                      |              |          |                                                                                                               |
|------------|---------|----------------------|--------------|----------|---------------------------------------------------------------------------------------------------------------|
| KF051884.1 |         | CGA/Ch78-3           | Chile        | European | <a href="https://www.ncbi.nlm.nih.gov/nuccore/KF051884.1">https://www.ncbi.nlm.nih.gov/nuccore/KF051884.1</a> |
| KF051882.1 |         | CGA/Ch78-1           | Chile        | European | <a href="https://www.ncbi.nlm.nih.gov/nuccore/KF051882.1">https://www.ncbi.nlm.nih.gov/nuccore/KF051882.1</a> |
| KF051894.1 |         | CGA/Ch78-16          | Chile        | European | <a href="https://www.ncbi.nlm.nih.gov/nuccore/KF051894.1">https://www.ncbi.nlm.nih.gov/nuccore/KF051894.1</a> |
| KF051898.1 |         | CGA/Ch87-28          | Chile        | European | <a href="https://www.ncbi.nlm.nih.gov/nuccore/KF051898.1">https://www.ncbi.nlm.nih.gov/nuccore/KF051898.1</a> |
| KF051889.1 |         | CGA/Ch78-10          | Chile        | European | <a href="https://www.ncbi.nlm.nih.gov/nuccore/KF051889.1">https://www.ncbi.nlm.nih.gov/nuccore/KF051889.1</a> |
| KF051899.1 |         | CGA/Ch78-30          | Chile        | European | <a href="https://www.ncbi.nlm.nih.gov/nuccore/KF051899.1">https://www.ncbi.nlm.nih.gov/nuccore/KF051899.1</a> |
| KF373259.1 |         | CGA/3201-5           | Chile        | European | <a href="https://www.ncbi.nlm.nih.gov/nuccore/KF373259.1">https://www.ncbi.nlm.nih.gov/nuccore/KF373259.1</a> |
| KF051896.1 |         | CGA/Ch87-25          | Chile        | European | <a href="https://www.ncbi.nlm.nih.gov/nuccore/KF051896.1">https://www.ncbi.nlm.nih.gov/nuccore/KF051896.1</a> |
| KF051890.1 |         | CGA/Ch78-11          | Chile        | European | <a href="https://www.ncbi.nlm.nih.gov/nuccore/KF051890.1">https://www.ncbi.nlm.nih.gov/nuccore/KF051890.1</a> |
| KF051888.1 |         | CGA/Ch78-8           | Chile        | European | <a href="https://www.ncbi.nlm.nih.gov/nuccore/KF051888.1">https://www.ncbi.nlm.nih.gov/nuccore/KF051888.1</a> |
| KF373255.1 |         | CGA/Ch1420-3         | Chile        | European | <a href="https://www.ncbi.nlm.nih.gov/nuccore/KF373255.1">https://www.ncbi.nlm.nih.gov/nuccore/KF373255.1</a> |
| KF373253.1 |         | CGA/Ch1390-112       | Chile        | European | <a href="https://www.ncbi.nlm.nih.gov/nuccore/KF373253.1">https://www.ncbi.nlm.nih.gov/nuccore/KF373253.1</a> |
| HE800145.1 | SC1 06  |                      | Norway       |          | <a href="https://www.ncbi.nlm.nih.gov/nuccore/HE800145.1">https://www.ncbi.nlm.nih.gov/nuccore/HE800145.1</a> |
| MH397897.1 |         | FM215/16             | Norway       |          | <a href="https://www.ncbi.nlm.nih.gov/nuccore/MH397897.1">https://www.ncbi.nlm.nih.gov/nuccore/MH397897.1</a> |
| MH397895.1 |         | FM213/16             | Norway       |          | <a href="https://www.ncbi.nlm.nih.gov/nuccore/MH397895.1">https://www.ncbi.nlm.nih.gov/nuccore/MH397895.1</a> |
| EU118820.1 |         | SK779/06 (HPR0 type) | Norway       |          | <a href="https://www.ncbi.nlm.nih.gov/nuccore/EU118820.1">https://www.ncbi.nlm.nih.gov/nuccore/EU118820.1</a> |
| HE800149.1 |         | SC1 09               | Norway       |          | <a href="https://www.ncbi.nlm.nih.gov/nuccore/HE800149.1">https://www.ncbi.nlm.nih.gov/nuccore/HE800149.1</a> |
| FN687284.1 |         | ISA1/07-1            | Norway       |          | <a href="https://www.ncbi.nlm.nih.gov/nuccore/FN687284.1">https://www.ncbi.nlm.nih.gov/nuccore/FN687284.1</a> |
| FR796469.1 | 200305A |                      | Norway       |          | <a href="https://www.ncbi.nlm.nih.gov/nuccore/FR796469.1">https://www.ncbi.nlm.nih.gov/nuccore/FR796469.1</a> |
| FR796470.1 | 200305B |                      | Norway       |          | <a href="https://www.ncbi.nlm.nih.gov/nuccore/FR796470.1">https://www.ncbi.nlm.nih.gov/nuccore/FR796470.1</a> |
| KF051871.1 |         | CGA/Ch26-5           | Chile        | European | <a href="https://www.ncbi.nlm.nih.gov/nuccore/KF051871.1">https://www.ncbi.nlm.nih.gov/nuccore/KF051871.1</a> |
| JN711096.1 | HPR0    | Scoy157/08           | UK: Scotland |          | <a href="https://www.ncbi.nlm.nih.gov/nuccore/JN711096.1">https://www.ncbi.nlm.nih.gov/nuccore/JN711096.1</a> |
| KF019742.1 |         | CGA/ID758            | Chile        |          | <a href="https://www.ncbi.nlm.nih.gov/nuccore/KF019742.1">https://www.ncbi.nlm.nih.gov/nuccore/KF019742.1</a> |
| KF051858.1 |         | CGA/Ch1504           | Chile        | European | <a href="https://www.ncbi.nlm.nih.gov/nuccore/KF051858.1">https://www.ncbi.nlm.nih.gov/nuccore/KF051858.1</a> |
| KF051856.1 |         | CGA/Ch15-2           | Chile        | European | <a href="https://www.ncbi.nlm.nih.gov/nuccore/KF051856.1">https://www.ncbi.nlm.nih.gov/nuccore/KF051856.1</a> |
| KF051861.1 |         | CGA/Ch15-7           | Chile        | European | <a href="https://www.ncbi.nlm.nih.gov/nuccore/KF051861.1">https://www.ncbi.nlm.nih.gov/nuccore/KF051861.1</a> |
| KF051864.1 |         | CGA/Ch15-10          | Chile        | European | <a href="https://www.ncbi.nlm.nih.gov/nuccore/KF051864.1">https://www.ncbi.nlm.nih.gov/nuccore/KF051864.1</a> |
| KF051863.1 |         | CGA/Ch15-9           | Chile        | European | <a href="https://www.ncbi.nlm.nih.gov/nuccore/KF051863.1">https://www.ncbi.nlm.nih.gov/nuccore/KF051863.1</a> |
| KF051865.1 |         | CGA/Ch15-11          | Chile        | European | <a href="https://www.ncbi.nlm.nih.gov/nuccore/KF051865.1">https://www.ncbi.nlm.nih.gov/nuccore/KF051865.1</a> |
| KF051868.1 |         | CGA/Ch15-14          | Chile        | European | <a href="https://www.ncbi.nlm.nih.gov/nuccore/KF051868.1">https://www.ncbi.nlm.nih.gov/nuccore/KF051868.1</a> |

Salmon isavirus phenotype multiplex RT-qPCR

|            |              |       |          |                                                                                                                     |
|------------|--------------|-------|----------|---------------------------------------------------------------------------------------------------------------------|
| KF051859.1 | CGA/Ch15-5   | Chile | European | <a href="https://www.ncbi.nlm.nih.gov/nucleotide/KF051859.1">https://www.ncbi.nlm.nih.gov/nucleotide/KF051859.1</a> |
| KF051862.1 | CGA/Ch15-8   | Chile | European | <a href="https://www.ncbi.nlm.nih.gov/nucleotide/KF051862.1">https://www.ncbi.nlm.nih.gov/nucleotide/KF051862.1</a> |
| KF051866.1 | CGA/Ch15-12  | Chile | European | <a href="https://www.ncbi.nlm.nih.gov/nucleotide/KF051866.1">https://www.ncbi.nlm.nih.gov/nucleotide/KF051866.1</a> |
| KF051869.1 | CGA/Ch15-15  | Chile | European | <a href="https://www.ncbi.nlm.nih.gov/nucleotide/KF051869.1">https://www.ncbi.nlm.nih.gov/nucleotide/KF051869.1</a> |
| KF051870.1 | CGA/Ch15-16  | Chile | European | <a href="https://www.ncbi.nlm.nih.gov/nucleotide/KF051870.1">https://www.ncbi.nlm.nih.gov/nucleotide/KF051870.1</a> |
| KF051855.1 | CGA/Ch15-1   | Chile | European | <a href="https://www.ncbi.nlm.nih.gov/nucleotide/KF051855.1">https://www.ncbi.nlm.nih.gov/nucleotide/KF051855.1</a> |
| KF051867.1 | CGA/Ch15-13  | Chile | European | <a href="https://www.ncbi.nlm.nih.gov/nucleotide/KF051867.1">https://www.ncbi.nlm.nih.gov/nucleotide/KF051867.1</a> |
| KF051860.1 | CGA/Ch15-16  | Chile | European | <a href="https://www.ncbi.nlm.nih.gov/nucleotide/KF051860.1">https://www.ncbi.nlm.nih.gov/nucleotide/KF051860.1</a> |
| KF373261.1 | CGA/3663-2   | Chile | European | <a href="https://www.ncbi.nlm.nih.gov/nucleotide/KF373261.1">https://www.ncbi.nlm.nih.gov/nucleotide/KF373261.1</a> |
| KF373260.1 | CGA/3663-1   | Chile | European | <a href="https://www.ncbi.nlm.nih.gov/nucleotide/KF373260.1">https://www.ncbi.nlm.nih.gov/nucleotide/KF373260.1</a> |
| KF413751.1 | CGA/Ch1673-5 | Chile | European | <a href="https://www.ncbi.nlm.nih.gov/nucleotide/KF413751.1">https://www.ncbi.nlm.nih.gov/nucleotide/KF413751.1</a> |
| FJ786968.1 | 29002        | Chile |          | <a href="https://www.ncbi.nlm.nih.gov/nucleotide/FJ786968.1">https://www.ncbi.nlm.nih.gov/nucleotide/FJ786968.1</a> |
| MF314005.1 | GIM-HPR3a    | Chile |          | <a href="https://www.ncbi.nlm.nih.gov/nucleotide/MF314005.1">https://www.ncbi.nlm.nih.gov/nucleotide/MF314005.1</a> |
| KF051874.1 | CGA/Ch71-4   | Chile | European | <a href="https://www.ncbi.nlm.nih.gov/nucleotide/KF051874.1">https://www.ncbi.nlm.nih.gov/nucleotide/KF051874.1</a> |
| KF051875.1 | CGA/Ch71-4   | Chile | European | <a href="https://www.ncbi.nlm.nih.gov/nucleotide/KF051875.1">https://www.ncbi.nlm.nih.gov/nucleotide/KF051875.1</a> |
| KF051876.1 | CGA/Ch17-7   | Chile | European | <a href="https://www.ncbi.nlm.nih.gov/nucleotide/KF051876.1">https://www.ncbi.nlm.nih.gov/nucleotide/KF051876.1</a> |
| KF051877.1 | CGA/Ch71-8   | Chile | European | <a href="https://www.ncbi.nlm.nih.gov/nucleotide/KF051877.1">https://www.ncbi.nlm.nih.gov/nucleotide/KF051877.1</a> |
| KF051878.1 | CGA/Ch71-9   | Chile | European | <a href="https://www.ncbi.nlm.nih.gov/nucleotide/KF051878.1">https://www.ncbi.nlm.nih.gov/nucleotide/KF051878.1</a> |
| MF314030.1 | GIM-17176    | Chile |          | <a href="https://www.ncbi.nlm.nih.gov/nucleotide/MF314030.1">https://www.ncbi.nlm.nih.gov/nucleotide/MF314030.1</a> |
| MF314029.1 | GIM17174     | Chile |          | <a href="https://www.ncbi.nlm.nih.gov/nucleotide/MF314029.1">https://www.ncbi.nlm.nih.gov/nucleotide/MF314029.1</a> |
| MF314008.1 | GIM-HPR14a   | Chile |          | <a href="https://www.ncbi.nlm.nih.gov/nucleotide/MF314008.1">https://www.ncbi.nlm.nih.gov/nucleotide/MF314008.1</a> |
| MF314022.1 | GIM-17169    | Chile |          | <a href="https://www.ncbi.nlm.nih.gov/nucleotide/MF314022.1">https://www.ncbi.nlm.nih.gov/nucleotide/MF314022.1</a> |
| MF314026.1 | GIM-17168    | Chile |          | <a href="https://www.ncbi.nlm.nih.gov/nucleotide/MF314026.1">https://www.ncbi.nlm.nih.gov/nucleotide/MF314026.1</a> |
| MF314025.1 | GIM-17166    | Chile |          | <a href="https://www.ncbi.nlm.nih.gov/nucleotide/MF314025.1">https://www.ncbi.nlm.nih.gov/nucleotide/MF314025.1</a> |
| MF314023.1 | GIM-17162    | Chile |          | <a href="https://www.ncbi.nlm.nih.gov/nucleotide/MF314023.1">https://www.ncbi.nlm.nih.gov/nucleotide/MF314023.1</a> |
| MF314024.1 | GIM-17164    | Chile |          | <a href="https://www.ncbi.nlm.nih.gov/nucleotide/MF314024.1">https://www.ncbi.nlm.nih.gov/nucleotide/MF314024.1</a> |
| MF314036.1 | GIM-19356    | Chile |          | <a href="https://www.ncbi.nlm.nih.gov/nucleotide/MF314036.1">https://www.ncbi.nlm.nih.gov/nucleotide/MF314036.1</a> |
| MF314028.1 | GIM-17172    | Chile |          | <a href="https://www.ncbi.nlm.nih.gov/nucleotide/MF314028.1">https://www.ncbi.nlm.nih.gov/nucleotide/MF314028.1</a> |
| MF314027.1 | GIM-17170    | Chile |          | <a href="https://www.ncbi.nlm.nih.gov/nucleotide/MF314027.1">https://www.ncbi.nlm.nih.gov/nucleotide/MF314027.1</a> |
| MF314015.1 | GIM-14332    | Chile |          | <a href="https://www.ncbi.nlm.nih.gov/nucleotide/MF314015.1">https://www.ncbi.nlm.nih.gov/nucleotide/MF314015.1</a> |

Salmon isavirus phenotype multiplex RT-qPCR

|            |              |                  |        |          |                                                                                                               |
|------------|--------------|------------------|--------|----------|---------------------------------------------------------------------------------------------------------------|
| MF325014.1 |              | GIM-21280        | Chile  |          | <a href="https://www.ncbi.nlm.nih.gov/nuccore/MF325014.1">https://www.ncbi.nlm.nih.gov/nuccore/MF325014.1</a> |
| MF314010.1 |              | GIM-19336        | Chile  |          | <a href="https://www.ncbi.nlm.nih.gov/nuccore/MF314010.1">https://www.ncbi.nlm.nih.gov/nuccore/MF314010.1</a> |
| MF314016.1 |              | GIM-14542        | Chile  |          | <a href="https://www.ncbi.nlm.nih.gov/nuccore/MF314016.1">https://www.ncbi.nlm.nih.gov/nuccore/MF314016.1</a> |
| MK125503.1 |              | T136/07          | Norway |          | <a href="https://www.ncbi.nlm.nih.gov/nuccore/MK125503.1">https://www.ncbi.nlm.nih.gov/nuccore/MK125503.1</a> |
| MK125502.1 |              | T132/07          | Norway |          | <a href="https://www.ncbi.nlm.nih.gov/nuccore/MK125502.1">https://www.ncbi.nlm.nih.gov/nuccore/MK125502.1</a> |
| MH397928.1 |              | N184/14          | Norway |          | <a href="https://www.ncbi.nlm.nih.gov/nuccore/MH397928.1">https://www.ncbi.nlm.nih.gov/nuccore/MH397928.1</a> |
| MH397927.1 |              | N182/13          | Norway |          | <a href="https://www.ncbi.nlm.nih.gov/nuccore/MH397927.1">https://www.ncbi.nlm.nih.gov/nuccore/MH397927.1</a> |
| MH397899.1 |              | H238/13          | Norway |          | <a href="https://www.ncbi.nlm.nih.gov/nuccore/MH397899.1">https://www.ncbi.nlm.nih.gov/nuccore/MH397899.1</a> |
| JN711063.1 |              | H138/08          | Norway |          | <a href="https://www.ncbi.nlm.nih.gov/nuccore/JN711063.1">https://www.ncbi.nlm.nih.gov/nuccore/JN711063.1</a> |
| HE800148.1 |              | SC1 08B          | Norway |          | <a href="https://www.ncbi.nlm.nih.gov/nuccore/HE800148.1">https://www.ncbi.nlm.nih.gov/nuccore/HE800148.1</a> |
| MH986021.1 |              | SF246b/18        | Norway |          | <a href="https://www.ncbi.nlm.nih.gov/nuccore/MH986021.1">https://www.ncbi.nlm.nih.gov/nuccore/MH986021.1</a> |
| MH397921.1 |              | SF210b/15        | Norway |          | <a href="https://www.ncbi.nlm.nih.gov/nuccore/MH397921.1">https://www.ncbi.nlm.nih.gov/nuccore/MH397921.1</a> |
| MF314014.1 |              | GIM-14046        | Chile  |          | <a href="https://www.ncbi.nlm.nih.gov/nuccore/MF314014.1">https://www.ncbi.nlm.nih.gov/nuccore/MF314014.1</a> |
| HE800165.1 | SC12 10B     |                  | Norway |          | <a href="https://www.ncbi.nlm.nih.gov/nuccore/HE800165.1">https://www.ncbi.nlm.nih.gov/nuccore/HE800165.1</a> |
| HE800164.1 | SC12 10A     |                  | Norway |          | <a href="https://www.ncbi.nlm.nih.gov/nuccore/HE800164.1">https://www.ncbi.nlm.nih.gov/nuccore/HE800164.1</a> |
| HE800160.1 | SC7 10       |                  | Norway |          | <a href="https://www.ncbi.nlm.nih.gov/nuccore/HE800160.1">https://www.ncbi.nlm.nih.gov/nuccore/HE800160.1</a> |
| HE800159.1 | SC6 10       |                  | Norway |          | <a href="https://www.ncbi.nlm.nih.gov/nuccore/HE800159.1">https://www.ncbi.nlm.nih.gov/nuccore/HE800159.1</a> |
| HE800157.1 | SC4 10       |                  | Norway |          | <a href="https://www.ncbi.nlm.nih.gov/nuccore/HE800157.1">https://www.ncbi.nlm.nih.gov/nuccore/HE800157.1</a> |
| HE800153.1 | SC3 09B      |                  | Norway |          | <a href="https://www.ncbi.nlm.nih.gov/nuccore/HE800153.1">https://www.ncbi.nlm.nih.gov/nuccore/HE800153.1</a> |
| HE800152.1 | SC3 09A      |                  | Norway |          | <a href="https://www.ncbi.nlm.nih.gov/nuccore/HE800152.1">https://www.ncbi.nlm.nih.gov/nuccore/HE800152.1</a> |
| HE800147.1 | SC1 08A      |                  | Norway |          | <a href="https://www.ncbi.nlm.nih.gov/nuccore/HE800147.1">https://www.ncbi.nlm.nih.gov/nuccore/HE800147.1</a> |
| MH397904.1 |              | H97e/04          | Norway |          | <a href="https://www.ncbi.nlm.nih.gov/nuccore/MH397904.1">https://www.ncbi.nlm.nih.gov/nuccore/MH397904.1</a> |
| HE800168.1 | SC14 10B     |                  | Norway |          | <a href="https://www.ncbi.nlm.nih.gov/nuccore/HE800168.1">https://www.ncbi.nlm.nih.gov/nuccore/HE800168.1</a> |
| HE800167.1 | SC14 10A     |                  | Norway |          | <a href="https://www.ncbi.nlm.nih.gov/nuccore/HE800167.1">https://www.ncbi.nlm.nih.gov/nuccore/HE800167.1</a> |
| HE800163.1 | SC11 10      |                  | Norway |          | <a href="https://www.ncbi.nlm.nih.gov/nuccore/HE800163.1">https://www.ncbi.nlm.nih.gov/nuccore/HE800163.1</a> |
| MH986020.1 |              | SF24a/18         | Norway |          | <a href="https://www.ncbi.nlm.nih.gov/nuccore/MH986020.1">https://www.ncbi.nlm.nih.gov/nuccore/MH986020.1</a> |
| DQ785252.1 |              | ISAV8(97/09/615) | Norway |          | <a href="https://www.ncbi.nlm.nih.gov/nuccore/DQ785252.1">https://www.ncbi.nlm.nih.gov/nuccore/DQ785252.1</a> |
| EU625673.1 | VT1128007-39 | Biovac 26936-2   | Chile  | European | <a href="https://www.ncbi.nlm.nih.gov/nuccore/EU625673.1">https://www.ncbi.nlm.nih.gov/nuccore/EU625673.1</a> |
| AY127876.1 |              | MR60/01          |        |          | <a href="https://www.ncbi.nlm.nih.gov/nuccore/AY127876.1">https://www.ncbi.nlm.nih.gov/nuccore/AY127876.1</a> |
| MF314041.1 |              | GIM-19380        | Chile  |          | <a href="https://www.ncbi.nlm.nih.gov/nuccore/MF314041.1">https://www.ncbi.nlm.nih.gov/nuccore/MF314041.1</a> |



Salmon isavirus phenotype multiplex RT-qPCR

|            |                            |                    |        |                                                                                                               |
|------------|----------------------------|--------------------|--------|---------------------------------------------------------------------------------------------------------------|
| FN687333.1 | ISA16/08                   |                    | Norway | <a href="https://www.ncbi.nlm.nih.gov/nuccore/FN687333.1">https://www.ncbi.nlm.nih.gov/nuccore/FN687333.1</a> |
| MF314042.1 |                            | GIM-19382          | Chile  | <a href="https://www.ncbi.nlm.nih.gov/nuccore/MF314042.1">https://www.ncbi.nlm.nih.gov/nuccore/MF314042.1</a> |
| MF314043.1 |                            | GIM-19384          | Chile  | <a href="https://www.ncbi.nlm.nih.gov/nuccore/MF314043.1">https://www.ncbi.nlm.nih.gov/nuccore/MF314043.1</a> |
| MF314037.1 |                            | GIM-19372          | Chile  | <a href="https://www.ncbi.nlm.nih.gov/nuccore/MF314037.1">https://www.ncbi.nlm.nih.gov/nuccore/MF314037.1</a> |
| MF314039.1 |                            | 19376              | Chile  | <a href="https://www.ncbi.nlm.nih.gov/nuccore/MF314039.1">https://www.ncbi.nlm.nih.gov/nuccore/MF314039.1</a> |
| MF314040.1 |                            | GIM-19378          | Chile  | <a href="https://www.ncbi.nlm.nih.gov/nuccore/MF314040.1">https://www.ncbi.nlm.nih.gov/nuccore/MF314040.1</a> |
| MF314038.1 |                            | GIM-19374          | Chile  | <a href="https://www.ncbi.nlm.nih.gov/nuccore/MF314038.1">https://www.ncbi.nlm.nih.gov/nuccore/MF314038.1</a> |
| MH397917.1 |                            | RU244/17           | Russia | <a href="https://www.ncbi.nlm.nih.gov/nuccore/MH397917.1">https://www.ncbi.nlm.nih.gov/nuccore/MH397917.1</a> |
| MH397916.1 |                            | RU243/17           | Russia | <a href="https://www.ncbi.nlm.nih.gov/nuccore/MH397916.1">https://www.ncbi.nlm.nih.gov/nuccore/MH397916.1</a> |
| MH397914.1 |                            | R230/17            | Norway | <a href="https://www.ncbi.nlm.nih.gov/nuccore/MH397914.1">https://www.ncbi.nlm.nih.gov/nuccore/MH397914.1</a> |
| MH397915.1 |                            | R231/170           | Norway | <a href="https://www.ncbi.nlm.nih.gov/nuccore/MH397915.1">https://www.ncbi.nlm.nih.gov/nuccore/MH397915.1</a> |
| MH397926.1 |                            | N180c/13           | Norway | <a href="https://www.ncbi.nlm.nih.gov/nuccore/MH397926.1">https://www.ncbi.nlm.nih.gov/nuccore/MH397926.1</a> |
| MH397924.1 |                            | N180a/13           | Norway | <a href="https://www.ncbi.nlm.nih.gov/nuccore/MH397924.1">https://www.ncbi.nlm.nih.gov/nuccore/MH397924.1</a> |
| FJ594294.1 |                            | Biovac32980-5      | Chile  | <a href="https://www.ncbi.nlm.nih.gov/nuccore/FJ594294.1">https://www.ncbi.nlm.nih.gov/nuccore/FJ594294.1</a> |
| MH397900.1 |                            | H245/18            | Norway | <a href="https://www.ncbi.nlm.nih.gov/nuccore/MH397900.1">https://www.ncbi.nlm.nih.gov/nuccore/MH397900.1</a> |
| DQ785253.1 |                            | ISAV9 (93/09/2163) | Norway | <a href="https://www.ncbi.nlm.nih.gov/nuccore/DQ785253.1">https://www.ncbi.nlm.nih.gov/nuccore/DQ785253.1</a> |
| KF051872.1 |                            | CGA/Ch2606         | Chile  | <a href="https://www.ncbi.nlm.nih.gov/nuccore/KF051872.1">https://www.ncbi.nlm.nih.gov/nuccore/KF051872.1</a> |
| MH397918.1 |                            | SF175/11           | Norway | <a href="https://www.ncbi.nlm.nih.gov/nuccore/MH397918.1">https://www.ncbi.nlm.nih.gov/nuccore/MH397918.1</a> |
| HE800146.1 | SC2 06                     |                    | Norway | <a href="https://www.ncbi.nlm.nih.gov/nuccore/HE800146.1">https://www.ncbi.nlm.nih.gov/nuccore/HE800146.1</a> |
| MH397913.1 |                            | R229/14            | Norway | <a href="https://www.ncbi.nlm.nih.gov/nuccore/MH397913.1">https://www.ncbi.nlm.nih.gov/nuccore/MH397913.1</a> |
| MH397909.1 |                            | MR102e/05          | Norway | <a href="https://www.ncbi.nlm.nih.gov/nuccore/MH397909.1">https://www.ncbi.nlm.nih.gov/nuccore/MH397909.1</a> |
| MH397908.1 |                            | MR102d/05          | Norway | <a href="https://www.ncbi.nlm.nih.gov/nuccore/MH397908.1">https://www.ncbi.nlm.nih.gov/nuccore/MH397908.1</a> |
| MH397906.1 |                            | MR102b/05          | Norway | <a href="https://www.ncbi.nlm.nih.gov/nuccore/MH397906.1">https://www.ncbi.nlm.nih.gov/nuccore/MH397906.1</a> |
| MH397896.1 |                            | FM214/16           | Norway | <a href="https://www.ncbi.nlm.nih.gov/nuccore/MH397896.1">https://www.ncbi.nlm.nih.gov/nuccore/MH397896.1</a> |
| MH397894.1 |                            | FM212/16           | Norway | <a href="https://www.ncbi.nlm.nih.gov/nuccore/MH397894.1">https://www.ncbi.nlm.nih.gov/nuccore/MH397894.1</a> |
| JN711091.1 |                            | T162/09            | Norway | <a href="https://www.ncbi.nlm.nih.gov/nuccore/JN711091.1">https://www.ncbi.nlm.nih.gov/nuccore/JN711091.1</a> |
| JN711064.1 |                            | H172/10            | Norway | <a href="https://www.ncbi.nlm.nih.gov/nuccore/JN711064.1">https://www.ncbi.nlm.nih.gov/nuccore/JN711064.1</a> |
| JN711094.1 |                            | CH29/08            | Chile  | <a href="https://www.ncbi.nlm.nih.gov/nuccore/JN711094.1">https://www.ncbi.nlm.nih.gov/nuccore/JN711094.1</a> |
| MH397922.1 |                            | SF233/14           | Norway | <a href="https://www.ncbi.nlm.nih.gov/nuccore/MH397922.1">https://www.ncbi.nlm.nih.gov/nuccore/MH397922.1</a> |
| MG976853.1 | NO/Lofoten/NVI-70-231/2015 |                    | Norway | <a href="https://www.ncbi.nlm.nih.gov/nuccore/MG976853.1">https://www.ncbi.nlm.nih.gov/nuccore/MG976853.1</a> |

Salmon isavirus phenotype multiplex RT-qPCR

|            |                            |                |              |                                                                                                               |
|------------|----------------------------|----------------|--------------|---------------------------------------------------------------------------------------------------------------|
| MG976852.1 | NO/Lofoten/NVI-70-201/2015 |                | Norway       | <a href="https://www.ncbi.nlm.nih.gov/nuccore/MG976852.1">https://www.ncbi.nlm.nih.gov/nuccore/MG976852.1</a> |
| MG976854.1 | NO/Lofoten/NVI-02-149/2015 |                | Norway       | <a href="https://www.ncbi.nlm.nih.gov/nuccore/MG976854.1">https://www.ncbi.nlm.nih.gov/nuccore/MG976854.1</a> |
| MH397929.1 |                            | N185a/14       | Norway       | <a href="https://www.ncbi.nlm.nih.gov/nuccore/MH397929.1">https://www.ncbi.nlm.nih.gov/nuccore/MH397929.1</a> |
| MH397938.1 |                            | N193/14        | Norway       | <a href="https://www.ncbi.nlm.nih.gov/nuccore/MH397938.1">https://www.ncbi.nlm.nih.gov/nuccore/MH397938.1</a> |
| MH397937.1 |                            | N190/14        | Norway       | <a href="https://www.ncbi.nlm.nih.gov/nuccore/MH397937.1">https://www.ncbi.nlm.nih.gov/nuccore/MH397937.1</a> |
| MH397939.1 |                            | N194/15        | Norway       | <a href="https://www.ncbi.nlm.nih.gov/nuccore/MH397939.1">https://www.ncbi.nlm.nih.gov/nuccore/MH397939.1</a> |
| MH397940.1 |                            | N196/15        | Norway       | <a href="https://www.ncbi.nlm.nih.gov/nuccore/MH397940.1">https://www.ncbi.nlm.nih.gov/nuccore/MH397940.1</a> |
| MH397925.1 |                            | N180b/13       | Norway       | <a href="https://www.ncbi.nlm.nih.gov/nuccore/MH397925.1">https://www.ncbi.nlm.nih.gov/nuccore/MH397925.1</a> |
| EU999161.1 | VT06132008-129             |                | Chile        | <a href="https://www.ncbi.nlm.nih.gov/nuccore/EU999161.1">https://www.ncbi.nlm.nih.gov/nuccore/EU999161.1</a> |
| MF314017.1 |                            | GIM-16334      | Chile        | <a href="https://www.ncbi.nlm.nih.gov/nuccore/MF314017.1">https://www.ncbi.nlm.nih.gov/nuccore/MF314017.1</a> |
| FJ786972.1 |                            | 27102-1        | Chile        | <a href="https://www.ncbi.nlm.nih.gov/nuccore/FJ786972.1">https://www.ncbi.nlm.nih.gov/nuccore/FJ786972.1</a> |
| FJ786971.1 |                            | 26905-10b      | Chile        | <a href="https://www.ncbi.nlm.nih.gov/nuccore/FJ786971.1">https://www.ncbi.nlm.nih.gov/nuccore/FJ786971.1</a> |
| MF314018.1 |                            | GIM-16358      | Chile        | <a href="https://www.ncbi.nlm.nih.gov/nuccore/MF314018.1">https://www.ncbi.nlm.nih.gov/nuccore/MF314018.1</a> |
| KF156954.1 |                            | T48-F169       | Chile        | <a href="https://www.ncbi.nlm.nih.gov/nuccore/KF156954.1">https://www.ncbi.nlm.nih.gov/nuccore/KF156954.1</a> |
| KF156953.1 |                            | T48-F166       | Chile        | <a href="https://www.ncbi.nlm.nih.gov/nuccore/KF156953.1">https://www.ncbi.nlm.nih.gov/nuccore/KF156953.1</a> |
| KF156952.1 |                            | T12-F164       | Chile        | <a href="https://www.ncbi.nlm.nih.gov/nuccore/KF156952.1">https://www.ncbi.nlm.nih.gov/nuccore/KF156952.1</a> |
| KF156951.1 |                            | TE-F11         | Chile        | <a href="https://www.ncbi.nlm.nih.gov/nuccore/KF156951.1">https://www.ncbi.nlm.nih.gov/nuccore/KF156951.1</a> |
| KM262777.1 |                            | 901_09         | Chile        | <a href="https://www.ncbi.nlm.nih.gov/nuccore/KM262777.1">https://www.ncbi.nlm.nih.gov/nuccore/KM262777.1</a> |
| FJ594282.1 |                            | Biovac31606-H  | Chile        | <a href="https://www.ncbi.nlm.nih.gov/nuccore/FJ594282.1">https://www.ncbi.nlm.nih.gov/nuccore/FJ594282.1</a> |
| FJ594283.1 |                            | Biovac31682-10 | Chile        | <a href="https://www.ncbi.nlm.nih.gov/nuccore/FJ594283.1">https://www.ncbi.nlm.nih.gov/nuccore/FJ594283.1</a> |
| FJ594291.1 |                            | Biovac31606-L  | Chile        | <a href="https://www.ncbi.nlm.nih.gov/nuccore/FJ594291.1">https://www.ncbi.nlm.nih.gov/nuccore/FJ594291.1</a> |
| FJ594288.1 |                            | Biovac31686-2  | Chile        | <a href="https://www.ncbi.nlm.nih.gov/nuccore/FJ594288.1">https://www.ncbi.nlm.nih.gov/nuccore/FJ594288.1</a> |
| MH397903.1 |                            | H97d/04        | Norway       | <a href="https://www.ncbi.nlm.nih.gov/nuccore/MH397903.1">https://www.ncbi.nlm.nih.gov/nuccore/MH397903.1</a> |
| FN687291.1 |                            | ISA4/07-2      | Norway       | <a href="https://www.ncbi.nlm.nih.gov/nuccore/FN687291.1">https://www.ncbi.nlm.nih.gov/nuccore/FN687291.1</a> |
| AY151812.1 |                            | Loch Nevis     | UK: Scotland | <a href="https://www.ncbi.nlm.nih.gov/nuccore/AY151812.1">https://www.ncbi.nlm.nih.gov/nuccore/AY151812.1</a> |
| EU625671.1 | VT11152007-031             | Biovac 26830   | Chile        | <a href="https://www.ncbi.nlm.nih.gov/nuccore/EU625671.1">https://www.ncbi.nlm.nih.gov/nuccore/EU625671.1</a> |
| EU625675.1 | VT11052007-27              | Biovac 2666-1  | Chile        | <a href="https://www.ncbi.nlm.nih.gov/nuccore/EU625675.1">https://www.ncbi.nlm.nih.gov/nuccore/EU625675.1</a> |
| EU849012.1 | VT04222008-106             | Biovac 1508 6  | Chile        | <a href="https://www.ncbi.nlm.nih.gov/nuccore/EU849012.1">https://www.ncbi.nlm.nih.gov/nuccore/EU849012.1</a> |
| FJ594317.1 |                            | Biovac31589-17 | Chile        | <a href="https://www.ncbi.nlm.nih.gov/nuccore/FJ594317.1">https://www.ncbi.nlm.nih.gov/nuccore/FJ594317.1</a> |

Salmon isavirus phenotype multiplex RT-qPCR

|            |                            |                  |              |          |                                                                                                                     |
|------------|----------------------------|------------------|--------------|----------|---------------------------------------------------------------------------------------------------------------------|
| EU271682.1 |                            | Biovac 26572     | Chile        |          | <a href="https://www.ncbi.nlm.nih.gov/nucleotide/EU271682.1">https://www.ncbi.nlm.nih.gov/nucleotide/EU271682.1</a> |
| MF314009.1 |                            | GIM-13968        | Chile        |          | <a href="https://www.ncbi.nlm.nih.gov/nucleotide/MF314009.1">https://www.ncbi.nlm.nih.gov/nucleotide/MF314009.1</a> |
| EU849018.1 | VT05202008                 | Biovac 30290-5   | Chile        |          | <a href="https://www.ncbi.nlm.nih.gov/nucleotide/EU849018.1">https://www.ncbi.nlm.nih.gov/nucleotide/EU849018.1</a> |
| EU849017.1 | VT05202008-111             | Biovac 30290-2   | Chile        |          | <a href="https://www.ncbi.nlm.nih.gov/nucleotide/EU849017.1">https://www.ncbi.nlm.nih.gov/nucleotide/EU849017.1</a> |
| EU849013.1 | VT04222008                 | Biovac 1508-7    | Chile        |          | <a href="https://www.ncbi.nlm.nih.gov/nucleotide/EU849013.1">https://www.ncbi.nlm.nih.gov/nucleotide/EU849013.1</a> |
| FJ594323.1 |                            | Biovac32913-66   | Chile        |          | <a href="https://www.ncbi.nlm.nih.gov/nucleotide/FJ594323.1">https://www.ncbi.nlm.nih.gov/nucleotide/FJ594323.1</a> |
| EU625670.1 |                            | Biovac 26829-2   | Chile        |          | <a href="https://www.ncbi.nlm.nih.gov/nucleotide/EU625670.1">https://www.ncbi.nlm.nih.gov/nucleotide/EU625670.1</a> |
| EU625668.1 | VT11282007-35 cell culture | Biovac 26560-10  | Chile        |          | <a href="https://www.ncbi.nlm.nih.gov/nucleotide/EU625668.1">https://www.ncbi.nlm.nih.gov/nucleotide/EU625668.1</a> |
| EU625677.1 | VT11282007-38 cell culture | Biovac 26936-1   | Chile        |          | <a href="https://www.ncbi.nlm.nih.gov/nucleotide/EU625677.1">https://www.ncbi.nlm.nih.gov/nucleotide/EU625677.1</a> |
| EU625674.1 | VT11282007-033             | Biovac 26416-6   | Chile        | European | <a href="https://www.ncbi.nlm.nih.gov/nucleotide/EU625674.1">https://www.ncbi.nlm.nih.gov/nucleotide/EU625674.1</a> |
| EU625678.1 | VT11282007-040             | Biovac 26955-1   | Chile        | European | <a href="https://www.ncbi.nlm.nih.gov/nucleotide/EU625678.1">https://www.ncbi.nlm.nih.gov/nucleotide/EU625678.1</a> |
| EU625669.1 | VT11282007-36              | Biovac 26905-1   | Chile        | European | <a href="https://www.ncbi.nlm.nih.gov/nucleotide/EU625669.1">https://www.ncbi.nlm.nih.gov/nucleotide/EU625669.1</a> |
| MF314013.1 |                            | GIM-13970        | Chile        |          | <a href="https://www.ncbi.nlm.nih.gov/nucleotide/MF314013.1">https://www.ncbi.nlm.nih.gov/nucleotide/MF314013.1</a> |
| AJ276859.1 |                            | 390/98           | UK: Scotland |          | <a href="https://www.ncbi.nlm.nih.gov/nucleotide/AJ276859.1">https://www.ncbi.nlm.nih.gov/nucleotide/AJ276859.1</a> |
| FJ594315.1 |                            | Biovac32916-1    | Chile        |          | <a href="https://www.ncbi.nlm.nih.gov/nucleotide/FJ594315.1">https://www.ncbi.nlm.nih.gov/nucleotide/FJ594315.1</a> |
| AF449423.1 |                            | RPC/NB-00 1025-1 | Canada       |          | <a href="https://www.ncbi.nlm.nih.gov/nucleotide/AF449423.1">https://www.ncbi.nlm.nih.gov/nucleotide/AF449423.1</a> |
| FJ594300.1 |                            | Biovac31589-16   | Chile        |          | <a href="https://www.ncbi.nlm.nih.gov/nucleotide/FJ594300.1">https://www.ncbi.nlm.nih.gov/nucleotide/FJ594300.1</a> |
| FJ594333.1 |                            | Biovac31588-14   | Chile        |          | <a href="https://www.ncbi.nlm.nih.gov/nucleotide/FJ594333.1">https://www.ncbi.nlm.nih.gov/nucleotide/FJ594333.1</a> |
| EU849015.1 | VT11282007-034             | Biovac 26560-4   | Chile        |          | <a href="https://www.ncbi.nlm.nih.gov/nucleotide/EU849015.1">https://www.ncbi.nlm.nih.gov/nucleotide/EU849015.1</a> |
| EU849014.1 | VT11282007-032             | Biovac 26416-5   | Chile        |          | <a href="https://www.ncbi.nlm.nih.gov/nucleotide/EU849014.1">https://www.ncbi.nlm.nih.gov/nucleotide/EU849014.1</a> |
| EU625680.1 | VT11282007-043             | Biovac 26955-4   | Chile        |          | <a href="https://www.ncbi.nlm.nih.gov/nucleotide/EU625680.1">https://www.ncbi.nlm.nih.gov/nucleotide/EU625680.1</a> |
| EU625676.1 | VT11282007-07              | Biovac 26905-10  | Chile        |          | <a href="https://www.ncbi.nlm.nih.gov/nucleotide/EU625676.1">https://www.ncbi.nlm.nih.gov/nucleotide/EU625676.1</a> |
| FJ594328.1 |                            | Biovac31587-8    | Chile        |          | <a href="https://www.ncbi.nlm.nih.gov/nucleotide/FJ594328.1">https://www.ncbi.nlm.nih.gov/nucleotide/FJ594328.1</a> |
| FJ594325.1 |                            | Biovac32719-108  | Chile        |          | <a href="https://www.ncbi.nlm.nih.gov/nucleotide/FJ594325.1">https://www.ncbi.nlm.nih.gov/nucleotide/FJ594325.1</a> |
| FJ594319.1 |                            | Biovac33064-107  | Chile        |          | <a href="https://www.ncbi.nlm.nih.gov/nucleotide/FJ594319.1">https://www.ncbi.nlm.nih.gov/nucleotide/FJ594319.1</a> |
| FJ594316.1 |                            | Biovac3303-4     | Chile        |          | <a href="https://www.ncbi.nlm.nih.gov/nucleotide/FJ594316.1">https://www.ncbi.nlm.nih.gov/nucleotide/FJ594316.1</a> |
| FJ594306.1 |                            | Biovac30741-8    | Chile        |          | <a href="https://www.ncbi.nlm.nih.gov/nucleotide/FJ594306.1">https://www.ncbi.nlm.nih.gov/nucleotide/FJ594306.1</a> |
| FJ594301.1 |                            | Biovac32089-P1   | Chile        |          | <a href="https://www.ncbi.nlm.nih.gov/nucleotide/FJ594301.1">https://www.ncbi.nlm.nih.gov/nucleotide/FJ594301.1</a> |
| FJ594295.1 |                            | PM-4165 #11      | Chile        |          | <a href="https://www.ncbi.nlm.nih.gov/nucleotide/FJ594295.1">https://www.ncbi.nlm.nih.gov/nucleotide/FJ594295.1</a> |

Salmon isavirus phenotype multiplex RT-qPCR

|            |                    |              |          |                                                                                                                     |
|------------|--------------------|--------------|----------|---------------------------------------------------------------------------------------------------------------------|
| EU625672.1 | Biovac 27615-5     | Chile        | European | <a href="https://www.ncbi.nlm.nih.gov/nucleotide/EU625672.1">https://www.ncbi.nlm.nih.gov/nucleotide/EU625672.1</a> |
| MF314007.1 | GIM-HPR7b          | Chile        |          | <a href="https://www.ncbi.nlm.nih.gov/nucleotide/MF314007.1">https://www.ncbi.nlm.nih.gov/nucleotide/MF314007.1</a> |
| MN885652.1 | ISAV_752           |              |          | <a href="https://www.ncbi.nlm.nih.gov/nucleotide/MN885652.1">https://www.ncbi.nlm.nih.gov/nucleotide/MN885652.1</a> |
| MH397905.1 | H97f/04            | Norway       |          | <a href="https://www.ncbi.nlm.nih.gov/nucleotide/MH397905.1">https://www.ncbi.nlm.nih.gov/nucleotide/MH397905.1</a> |
| FJ594311.1 | Biovac31647-3      | Chile        |          | <a href="https://www.ncbi.nlm.nih.gov/nucleotide/FJ594311.1">https://www.ncbi.nlm.nih.gov/nucleotide/FJ594311.1</a> |
| AF302802.1 | Loch Nevis/98      | UK: Scotland |          | <a href="https://www.ncbi.nlm.nih.gov/nucleotide/AF302802.1">https://www.ncbi.nlm.nih.gov/nucleotide/AF302802.1</a> |
| AF283997.2 | 390/98             | UK: Scotland |          | <a href="https://www.ncbi.nlm.nih.gov/nucleotide/AF283997.2">https://www.ncbi.nlm.nih.gov/nucleotide/AF283997.2</a> |
| AF395337.1 | 912/99             | UK: Scotland |          | <a href="https://www.ncbi.nlm.nih.gov/nucleotide/AF395337.1">https://www.ncbi.nlm.nih.gov/nucleotide/AF395337.1</a> |
| AF388582.1 | 832/98             | UK: Scotland |          | <a href="https://www.ncbi.nlm.nih.gov/nucleotide/AF388582.1">https://www.ncbi.nlm.nih.gov/nucleotide/AF388582.1</a> |
| HE800174.1 | ISA9 09A           | Norway       |          | <a href="https://www.ncbi.nlm.nih.gov/nucleotide/HE800174.1">https://www.ncbi.nlm.nih.gov/nucleotide/HE800174.1</a> |
| HE800175.1 | ISA9 09B           | Norway       |          | <a href="https://www.ncbi.nlm.nih.gov/nucleotide/HE800175.1">https://www.ncbi.nlm.nih.gov/nucleotide/HE800175.1</a> |
| FJ594309.1 | Biovac33059-2      | Chile        |          | <a href="https://www.ncbi.nlm.nih.gov/nucleotide/FJ594309.1">https://www.ncbi.nlm.nih.gov/nucleotide/FJ594309.1</a> |
| FJ594331.1 | Biovac31591-6      | Chile        |          | <a href="https://www.ncbi.nlm.nih.gov/nucleotide/FJ594331.1">https://www.ncbi.nlm.nih.gov/nucleotide/FJ594331.1</a> |
| FJ594312.1 | Biovac31590-20     | Chile        |          | <a href="https://www.ncbi.nlm.nih.gov/nucleotide/FJ594312.1">https://www.ncbi.nlm.nih.gov/nucleotide/FJ594312.1</a> |
| FJ594329.1 | Biovac31590-18     | Chile        |          | <a href="https://www.ncbi.nlm.nih.gov/nucleotide/FJ594329.1">https://www.ncbi.nlm.nih.gov/nucleotide/FJ594329.1</a> |
| FJ594327.1 | Biovac31685-1      | Chile        |          | <a href="https://www.ncbi.nlm.nih.gov/nucleotide/FJ594327.1">https://www.ncbi.nlm.nih.gov/nucleotide/FJ594327.1</a> |
| FJ594322.1 | Biovac32232-2032LK | Chile        |          | <a href="https://www.ncbi.nlm.nih.gov/nucleotide/FJ594322.1">https://www.ncbi.nlm.nih.gov/nucleotide/FJ594322.1</a> |
| FJ594320.1 | Biovac31591-7      | Chile        |          | <a href="https://www.ncbi.nlm.nih.gov/nucleotide/FJ594320.1">https://www.ncbi.nlm.nih.gov/nucleotide/FJ594320.1</a> |
| FJ594304.1 | Biovac31790-3GH    | Chile        |          | <a href="https://www.ncbi.nlm.nih.gov/nucleotide/FJ594304.1">https://www.ncbi.nlm.nih.gov/nucleotide/FJ594304.1</a> |
| FJ594302.1 | Biovac31790-9GH    | Chile        |          | <a href="https://www.ncbi.nlm.nih.gov/nucleotide/FJ594302.1">https://www.ncbi.nlm.nih.gov/nucleotide/FJ594302.1</a> |
| EU851043.1 | CH01/08            | Chile        |          | <a href="https://www.ncbi.nlm.nih.gov/nucleotide/EU851043.1">https://www.ncbi.nlm.nih.gov/nucleotide/EU851043.1</a> |
| FJ594314.1 | Biovac32232-2044K  | Chile        |          | <a href="https://www.ncbi.nlm.nih.gov/nucleotide/FJ594314.1">https://www.ncbi.nlm.nih.gov/nucleotide/FJ594314.1</a> |
| FJ594324.1 | Biovac31649-9      | Chile        |          | <a href="https://www.ncbi.nlm.nih.gov/nucleotide/FJ594324.1">https://www.ncbi.nlm.nih.gov/nucleotide/FJ594324.1</a> |
| FJ594308.1 | Biovac31647.8GH    | Chile        |          | <a href="https://www.ncbi.nlm.nih.gov/nucleotide/FJ594308.1">https://www.ncbi.nlm.nih.gov/nucleotide/FJ594308.1</a> |
| FJ594334.1 | Biovac31648-3GH    | Chile        |          | <a href="https://www.ncbi.nlm.nih.gov/nucleotide/FJ594334.1">https://www.ncbi.nlm.nih.gov/nucleotide/FJ594334.1</a> |
| FJ594321.1 | Biovac31905-7Cz    | Chile        |          | <a href="https://www.ncbi.nlm.nih.gov/nucleotide/FJ594321.1">https://www.ncbi.nlm.nih.gov/nucleotide/FJ594321.1</a> |
| FJ594318.1 | Biovac31648-5GH    | Chile        |          | <a href="https://www.ncbi.nlm.nih.gov/nucleotide/FJ594318.1">https://www.ncbi.nlm.nih.gov/nucleotide/FJ594318.1</a> |
| FJ594313.1 | Biovac31905-9Cz    | Chile        |          | <a href="https://www.ncbi.nlm.nih.gov/nucleotide/FJ594313.1">https://www.ncbi.nlm.nih.gov/nucleotide/FJ594313.1</a> |
| FJ594303.1 | Biovac29560-2H     | Chile        |          | <a href="https://www.ncbi.nlm.nih.gov/nucleotide/FJ594303.1">https://www.ncbi.nlm.nih.gov/nucleotide/FJ594303.1</a> |
| FJ594330.1 | Biovac31587-9      | Chile        |          | <a href="https://www.ncbi.nlm.nih.gov/nucleotide/FJ594330.1">https://www.ncbi.nlm.nih.gov/nucleotide/FJ594330.1</a> |

Salmon isavirus phenotype multiplex RT-qPCR

|            |           |                   |               |          |                                                                                                               |
|------------|-----------|-------------------|---------------|----------|---------------------------------------------------------------------------------------------------------------|
| FJ594326.1 |           | PM-4165 #8        | Chile         |          | <a href="https://www.ncbi.nlm.nih.gov/nuccore/FJ594326.1">https://www.ncbi.nlm.nih.gov/nuccore/FJ594326.1</a> |
| FJ594310.1 |           | Biovac31685-3     | Chile         |          | <a href="https://www.ncbi.nlm.nih.gov/nuccore/FJ594310.1">https://www.ncbi.nlm.nih.gov/nuccore/FJ594310.1</a> |
| GU830900.1 |           | 752               | Chile         |          | <a href="https://www.ncbi.nlm.nih.gov/nuccore/GU830900.1">https://www.ncbi.nlm.nih.gov/nuccore/GU830900.1</a> |
| FJ594299.1 |           | Biovac31689-1     | Chile         |          | <a href="https://www.ncbi.nlm.nih.gov/nuccore/FJ594299.1">https://www.ncbi.nlm.nih.gov/nuccore/FJ594299.1</a> |
| FJ594298.1 |           | Biovac31689-4     | Chile         |          | <a href="https://www.ncbi.nlm.nih.gov/nuccore/FJ594298.1">https://www.ncbi.nlm.nih.gov/nuccore/FJ594298.1</a> |
| MF314033.1 |           | GIM-17634         | Chile         |          | <a href="https://www.ncbi.nlm.nih.gov/nuccore/MF314033.1">https://www.ncbi.nlm.nih.gov/nuccore/MF314033.1</a> |
| MF314032.1 |           | GIM-17632         | Chile         |          | <a href="https://www.ncbi.nlm.nih.gov/nuccore/MF314032.1">https://www.ncbi.nlm.nih.gov/nuccore/MF314032.1</a> |
| MF314031.1 |           | GIM-17626         | Chile         |          | <a href="https://www.ncbi.nlm.nih.gov/nuccore/MF314031.1">https://www.ncbi.nlm.nih.gov/nuccore/MF314031.1</a> |
| MF314048.1 |           | GIM-20356         | Chile         |          | <a href="https://www.ncbi.nlm.nih.gov/nuccore/MF314048.1">https://www.ncbi.nlm.nih.gov/nuccore/MF314048.1</a> |
| JN711069.1 |           | NT134/08          | Norway        |          | <a href="https://www.ncbi.nlm.nih.gov/nuccore/JN711069.1">https://www.ncbi.nlm.nih.gov/nuccore/JN711069.1</a> |
| FN687317.1 | ISA7/08-2 |                   | Norway        |          | <a href="https://www.ncbi.nlm.nih.gov/nuccore/FN687317.1">https://www.ncbi.nlm.nih.gov/nuccore/FN687317.1</a> |
| FJ786969.1 |           | 32141             | Chile         |          | <a href="https://www.ncbi.nlm.nih.gov/nuccore/FJ786969.1">https://www.ncbi.nlm.nih.gov/nuccore/FJ786969.1</a> |
| FN687316.2 | ISA7/08-1 |                   | Norway        |          | <a href="https://www.ncbi.nlm.nih.gov/nuccore/FN687316.2">https://www.ncbi.nlm.nih.gov/nuccore/FN687316.2</a> |
| FJ594332.1 |           | Biovac33004-21    | Chile         |          | <a href="https://www.ncbi.nlm.nih.gov/nuccore/FJ594332.1">https://www.ncbi.nlm.nih.gov/nuccore/FJ594332.1</a> |
| EU625681.1 |           | Biovac 26955-5    | Chile         | European | <a href="https://www.ncbi.nlm.nih.gov/nuccore/EU625681.1">https://www.ncbi.nlm.nih.gov/nuccore/EU625681.1</a> |
| GU830908.1 |           | 901               | Chile         |          | <a href="https://www.ncbi.nlm.nih.gov/nuccore/GU830908.1">https://www.ncbi.nlm.nih.gov/nuccore/GU830908.1</a> |
| FJ594307.1 |           | Biovac31667-5GH   | Chile         |          | <a href="https://www.ncbi.nlm.nih.gov/nuccore/FJ594307.1">https://www.ncbi.nlm.nih.gov/nuccore/FJ594307.1</a> |
| FJ594305.1 |           | Biovac31667-3GH   | Chile         |          | <a href="https://www.ncbi.nlm.nih.gov/nuccore/FJ594305.1">https://www.ncbi.nlm.nih.gov/nuccore/FJ594305.1</a> |
| FJ594293.1 |           | Biovac31682-5     | Chile         |          | <a href="https://www.ncbi.nlm.nih.gov/nuccore/FJ594293.1">https://www.ncbi.nlm.nih.gov/nuccore/FJ594293.1</a> |
| JN711095.1 | HPR0      | Ch30/80           | Chile         |          | <a href="https://www.ncbi.nlm.nih.gov/nuccore/JN711095.1">https://www.ncbi.nlm.nih.gov/nuccore/JN711095.1</a> |
| KY688275.1 |           | CA/OEI/G0057/2014 | North America |          | <a href="https://www.ncbi.nlm.nih.gov/nuccore/KY688275.1">https://www.ncbi.nlm.nih.gov/nuccore/KY688275.1</a> |
| KY688272.1 |           | CA/NS/G0003/2012  | North America |          | <a href="https://www.ncbi.nlm.nih.gov/nuccore/KY688272.1">https://www.ncbi.nlm.nih.gov/nuccore/KY688272.1</a> |
| KY688224.1 |           | CA/NB/G0010/2015  | North America |          | <a href="https://www.ncbi.nlm.nih.gov/nuccore/KY688224.1">https://www.ncbi.nlm.nih.gov/nuccore/KY688224.1</a> |
| KY688267.1 |           | CA/NL/G0051/2013  | North America |          | <a href="https://www.ncbi.nlm.nih.gov/nuccore/KY688267.1">https://www.ncbi.nlm.nih.gov/nuccore/KY688267.1</a> |
| KY688265.1 |           | CA/NL/G0050/2012  | North America |          | <a href="https://www.ncbi.nlm.nih.gov/nuccore/KY688265.1">https://www.ncbi.nlm.nih.gov/nuccore/KY688265.1</a> |
| KY688261.1 |           | CA/NL/G0026/2013  | North America |          | <a href="https://www.ncbi.nlm.nih.gov/nuccore/KY688261.1">https://www.ncbi.nlm.nih.gov/nuccore/KY688261.1</a> |
| KY688259.1 |           | CA/NL/G0018/2013  | North America |          | <a href="https://www.ncbi.nlm.nih.gov/nuccore/KY688259.1">https://www.ncbi.nlm.nih.gov/nuccore/KY688259.1</a> |
| AY151815.1 |           | NB028             | Canada        |          | <a href="https://www.ncbi.nlm.nih.gov/nuccore/AY151815.1">https://www.ncbi.nlm.nih.gov/nuccore/AY151815.1</a> |
| AY151814.1 |           | NB877             | Canada        |          | <a href="https://www.ncbi.nlm.nih.gov/nuccore/AY151814.1">https://www.ncbi.nlm.nih.gov/nuccore/AY151814.1</a> |
| AY151809.1 |           | NB280             | Canada        |          | <a href="https://www.ncbi.nlm.nih.gov/nuccore/AY151809.1">https://www.ncbi.nlm.nih.gov/nuccore/AY151809.1</a> |

Salmon isavirus phenotype multiplex RT-qPCR

|             |                      |        |               |                                                                                                                 |
|-------------|----------------------|--------|---------------|-----------------------------------------------------------------------------------------------------------------|
| AF294870.1  | RPC/NB-280-2         | Canada |               | <a href="https://www.ncbi.nlm.nih.gov/nuccore/AF294870.1">https://www.ncbi.nlm.nih.gov/nuccore/AF294870.1</a>   |
| KU587561.1  | CA/NS/2012-21/2012   | Canada | North America | <a href="https://www.ncbi.nlm.nih.gov/nuccore/KU587561.1">https://www.ncbi.nlm.nih.gov/nuccore/KU587561.1</a>   |
| KY688253.1  | CA/NB/G0115/2016     | Canada | North America | <a href="https://www.ncbi.nlm.nih.gov/nuccore/KY688253.1">https://www.ncbi.nlm.nih.gov/nuccore/KY688253.1</a>   |
| KY688250.1  | CA/NB/G0094/2016     | Canada | North America | <a href="https://www.ncbi.nlm.nih.gov/nuccore/KY688250.1">https://www.ncbi.nlm.nih.gov/nuccore/KY688250.1</a>   |
| KY688237.1  | CA/NB/G0040/2016     | Canada | North America | <a href="https://www.ncbi.nlm.nih.gov/nuccore/KY688237.1">https://www.ncbi.nlm.nih.gov/nuccore/KY688237.1</a>   |
| KY688234.1  | CA/NB/G0029/2012     | Canada | North America | <a href="https://www.ncbi.nlm.nih.gov/nuccore/KY688234.1">https://www.ncbi.nlm.nih.gov/nuccore/KY688234.1</a>   |
| KY688260.1  | CA/NL/G0018/2013     | Canada | North America | <a href="https://www.ncbi.nlm.nih.gov/nuccore/KY688260.1">https://www.ncbi.nlm.nih.gov/nuccore/KY688260.1</a>   |
| KY688262.1  | CA/NL/G0026/2013 (B) | Canada | North America | <a href="https://www.ncbi.nlm.nih.gov/nuccore/KY688262.1">https://www.ncbi.nlm.nih.gov/nuccore/KY688262.1</a>   |
| KY688263.1  | CA/NL/G0028/2013     | Canada | North America | <a href="https://www.ncbi.nlm.nih.gov/nuccore/KY688263.1">https://www.ncbi.nlm.nih.gov/nuccore/KY688263.1</a>   |
| KY688221.1  | CA/NB/G0004/2015     | Canada | North America | <a href="https://www.ncbi.nlm.nih.gov/nuccore/KY688221.1">https://www.ncbi.nlm.nih.gov/nuccore/KY688221.1</a>   |
| AF283996.1  | NBIA01               | Canada |               | <a href="https://www.ncbi.nlm.nih.gov/nuccore/AF283996.1">https://www.ncbi.nlm.nih.gov/nuccore/AF283996.1</a>   |
| EU267932.1  | MT06010401-6         | USA    |               | <a href="https://www.ncbi.nlm.nih.gov/nuccore/EU267932.1">https://www.ncbi.nlm.nih.gov/nuccore/EU267932.1</a>   |
| EU267933.1  | MT06012702-3         | USA    |               | <a href="https://www.ncbi.nlm.nih.gov/nuccore/EU267933.1">https://www.ncbi.nlm.nih.gov/nuccore/EU267933.1</a>   |
| KU587569.1  | CA/NS/G0008/2012     | Canada | North America | <a href="https://www.ncbi.nlm.nih.gov/nuccore/KU587569.1">https://www.ncbi.nlm.nih.gov/nuccore/KU587569.1</a>   |
| AF294878.1  | HKS-36               | Canada |               | <a href="https://www.ncbi.nlm.nih.gov/nuccore/AF294878.1">https://www.ncbi.nlm.nih.gov/nuccore/AF294878.1</a>   |
| AY963264.1  | RCP/NB 02-1179-4     | Canada | North America | <a href="https://www.ncbi.nlm.nih.gov/nuccore/AY963264.1">https://www.ncbi.nlm.nih.gov/nuccore/AY963264.1</a>   |
| AF294871.1  | RCP/NB-028-10        | Canada |               | <a href="https://www.ncbi.nlm.nih.gov/nuccore/AF294871.1">https://www.ncbi.nlm.nih.gov/nuccore/AF294871.1</a>   |
| AF294876.1  | RCP/NB-049           | Canada |               | <a href="https://www.ncbi.nlm.nih.gov/nuccore/AF294876.1">https://www.ncbi.nlm.nih.gov/nuccore/AF294876.1</a>   |
| EF105375.1  | NB-RT#5              | Canada | North America | <a href="https://www.ncbi.nlm.nih.gov/nuccore/EF105375.1">https://www.ncbi.nlm.nih.gov/nuccore/EF105375.1</a>   |
| AF294875.1  | RCP/NB-002-2         | Canada |               | <a href="https://www.ncbi.nlm.nih.gov/nuccore/AF294875.1">https://www.ncbi.nlm.nih.gov/nuccore/AF294875.1</a>   |
| KX424587.1  | ISAV NA-HPR4 (970-1) | Canada | North America | <a href="https://www.ncbi.nlm.nih.gov/nuccore/KX424587.1">https://www.ncbi.nlm.nih.gov/nuccore/KX424587.1</a>   |
| NC_006499.1 | CCBB                 | Canada |               | <a href="https://www.ncbi.nlm.nih.gov/nuccore/NC_006499.1">https://www.ncbi.nlm.nih.gov/nuccore/NC_006499.1</a> |
| AF404342.1  | CCBB                 | Canada |               | <a href="https://www.ncbi.nlm.nih.gov/nuccore/AF404342.1">https://www.ncbi.nlm.nih.gov/nuccore/AF404342.1</a>   |
| HQ011275.1  | NBISA01              | Canada | North America | <a href="https://www.ncbi.nlm.nih.gov/nuccore/HQ011275.1">https://www.ncbi.nlm.nih.gov/nuccore/HQ011275.1</a>   |
| AY963265.1  | RCP/NB 02-0775-14    | Canada | North America | <a href="https://www.ncbi.nlm.nih.gov/nuccore/AY963265.1">https://www.ncbi.nlm.nih.gov/nuccore/AY963265.1</a>   |
| AY062035.1  | RCP/NB-010651-1      | Canada |               | <a href="https://www.ncbi.nlm.nih.gov/nuccore/AY062035.1">https://www.ncbi.nlm.nih.gov/nuccore/AY062035.1</a>   |
| AY062034.1  | RCP/NB-010645-1      | Canada |               | <a href="https://www.ncbi.nlm.nih.gov/nuccore/AY062034.1">https://www.ncbi.nlm.nih.gov/nuccore/AY062034.1</a>   |
| AY963266.1  | RCP/NB 01-0973-3     | Canada | North America | <a href="https://www.ncbi.nlm.nih.gov/nuccore/AY963266.1">https://www.ncbi.nlm.nih.gov/nuccore/AY963266.1</a>   |
| AY062033.1  | RCP/NB-010593-1      | Canada |               | <a href="https://www.ncbi.nlm.nih.gov/nuccore/AY062033.1">https://www.ncbi.nlm.nih.gov/nuccore/AY062033.1</a>   |
| AF297551.1  | GA/T0 FISH03         | Canada |               | <a href="https://www.ncbi.nlm.nih.gov/nuccore/AF297551.1">https://www.ncbi.nlm.nih.gov/nuccore/AF297551.1</a>   |

Salmon isavirus phenotype multiplex RT-qPCR

|            |                                 |                  |               |               |                                                                                                               |
|------------|---------------------------------|------------------|---------------|---------------|---------------------------------------------------------------------------------------------------------------|
| AF294880.1 |                                 | RCP/NB-990-681-3 | Canada        |               | <a href="https://www.ncbi.nlm.nih.gov/nuccore/AF294880.1">https://www.ncbi.nlm.nih.gov/nuccore/AF294880.1</a> |
| AF294879.1 |                                 | 7833-1           | Chile         |               | <a href="https://www.ncbi.nlm.nih.gov/nuccore/AF294879.1">https://www.ncbi.nlm.nih.gov/nuccore/AF294879.1</a> |
| AF294877.1 |                                 | RCP/NB-877       | Canada        |               | <a href="https://www.ncbi.nlm.nih.gov/nuccore/AF294877.1">https://www.ncbi.nlm.nih.gov/nuccore/AF294877.1</a> |
| AF294874.1 |                                 | RCP/NB-990-508-3 | Canada        |               | <a href="https://www.ncbi.nlm.nih.gov/nuccore/AF294874.1">https://www.ncbi.nlm.nih.gov/nuccore/AF294874.1</a> |
| AF294873.1 |                                 | RCP/NB-458       | Canada        |               | <a href="https://www.ncbi.nlm.nih.gov/nuccore/AF294873.1">https://www.ncbi.nlm.nih.gov/nuccore/AF294873.1</a> |
| AF294872.1 |                                 | DF0-1            | Canada        |               | <a href="https://www.ncbi.nlm.nih.gov/nuccore/AF294872.1">https://www.ncbi.nlm.nih.gov/nuccore/AF294872.1</a> |
| AF283995.1 |                                 | Back Bay 98      | Canada        |               | <a href="https://www.ncbi.nlm.nih.gov/nuccore/AF283995.1">https://www.ncbi.nlm.nih.gov/nuccore/AF283995.1</a> |
| AY059402.1 |                                 | ME/01            |               |               | <a href="https://www.ncbi.nlm.nih.gov/nuccore/AY059402.1">https://www.ncbi.nlm.nih.gov/nuccore/AY059402.1</a> |
| AF302800.1 |                                 | Bay of Fundy/97  | Canada        |               | <a href="https://www.ncbi.nlm.nih.gov/nuccore/AF302800.1">https://www.ncbi.nlm.nih.gov/nuccore/AF302800.1</a> |
| EF105376.1 |                                 | RCP/NB-04-0416-6 | Canada        | North America | <a href="https://www.ncbi.nlm.nih.gov/nuccore/EF105376.1">https://www.ncbi.nlm.nih.gov/nuccore/EF105376.1</a> |
| KU587577.1 |                                 | CA/NL/G0010/2012 | Canada        | North America | <a href="https://www.ncbi.nlm.nih.gov/nuccore/KU587577.1">https://www.ncbi.nlm.nih.gov/nuccore/KU587577.1</a> |
| HM172543.1 |                                 | U31577           | Canada        |               | <a href="https://www.ncbi.nlm.nih.gov/nuccore/HM172543.1">https://www.ncbi.nlm.nih.gov/nuccore/HM172543.1</a> |
| HM172541.1 |                                 | U27573           | Canada        |               | <a href="https://www.ncbi.nlm.nih.gov/nuccore/HM172541.1">https://www.ncbi.nlm.nih.gov/nuccore/HM172541.1</a> |
| MT997778.1 | N0/Finnmark/NVI-70-820-2020     |                  | Norway        |               | <a href="https://www.ncbi.nlm.nih.gov/nuccore/MT997778.1">https://www.ncbi.nlm.nih.gov/nuccore/MT997778.1</a> |
| MT613041.1 | N0/Salten/NVI-70-595/2020       |                  | Norway        |               | <a href="https://www.ncbi.nlm.nih.gov/nuccore/MT613041.1">https://www.ncbi.nlm.nih.gov/nuccore/MT613041.1</a> |
| AJ440970.1 |                                 | 1173/01/12       | Faroe Islands |               | <a href="https://www.ncbi.nlm.nih.gov/nuccore/AJ440970.1">https://www.ncbi.nlm.nih.gov/nuccore/AJ440970.1</a> |
| MT413443.1 | N0/Finnmark/NVI-70-72/2020      |                  | Norway        |               | <a href="https://www.ncbi.nlm.nih.gov/nuccore/MT413443.1">https://www.ncbi.nlm.nih.gov/nuccore/MT413443.1</a> |
| MN901922.1 | N0/Finnmark/NVI-04-56129/2019   |                  | Norway        |               | <a href="https://www.ncbi.nlm.nih.gov/nuccore/MN901922.1">https://www.ncbi.nlm.nih.gov/nuccore/MN901922.1</a> |
| MN901918.1 | N0/Sor-Troms/NVI-70-1302/2019   |                  | Norway        |               | <a href="https://www.ncbi.nlm.nih.gov/nuccore/MN901918.1">https://www.ncbi.nlm.nih.gov/nuccore/MN901918.1</a> |
| MK216313.1 | N0/Nordfjord/NVI-50-202/2018    |                  | Norway        |               | <a href="https://www.ncbi.nlm.nih.gov/nuccore/MK216313.1">https://www.ncbi.nlm.nih.gov/nuccore/MK216313.1</a> |
| MK216321.1 | N0/Midthordland/NVI-50-542/2018 |                  | Norway        |               | <a href="https://www.ncbi.nlm.nih.gov/nuccore/MK216321.1">https://www.ncbi.nlm.nih.gov/nuccore/MK216321.1</a> |
| MK216310.1 | N0/Sunnhordland/NVI-50-323/2017 |                  | Norway        |               | <a href="https://www.ncbi.nlm.nih.gov/nuccore/MK216310.1">https://www.ncbi.nlm.nih.gov/nuccore/MK216310.1</a> |
| MK216308.1 | N0/Lofoten/NVI-02-67/2017       |                  | Norway        |               | <a href="https://www.ncbi.nlm.nih.gov/nuccore/MK216308.1">https://www.ncbi.nlm.nih.gov/nuccore/MK216308.1</a> |



### Salmon isavirus phenotype multiplex RT-qPCR

|            |                                |        |          |                                                                                                                     |
|------------|--------------------------------|--------|----------|---------------------------------------------------------------------------------------------------------------------|
| MK216307.1 | N0/Salten/NVI-70-1297/2016     |        | Norway   | <a href="https://www.ncbi.nlm.nih.gov/nucleotide/MK216307.1">https://www.ncbi.nlm.nih.gov/nucleotide/MK216307.1</a> |
| MK216303.1 | N0/Vesteralen/NVI-70-9227/2013 |        | Norway   | <a href="https://www.ncbi.nlm.nih.gov/nucleotide/MK216303.1">https://www.ncbi.nlm.nih.gov/nucleotide/MK216303.1</a> |
| MK216304.1 | N0/Lofoten/NVI-70-2774/2014    |        | Norway   | <a href="https://www.ncbi.nlm.nih.gov/nucleotide/MK216304.1">https://www.ncbi.nlm.nih.gov/nucleotide/MK216304.1</a> |
| MK216305.1 | N0/Helgeland/NVI-70-1169/2015  |        | Norway   | <a href="https://www.ncbi.nlm.nih.gov/nucleotide/MK216305.1">https://www.ncbi.nlm.nih.gov/nucleotide/MK216305.1</a> |
| AJ276859.1 |                                | 390/98 | Scotland | <a href="https://www.ncbi.nlm.nih.gov/nucleotide/AJ276859.1">https://www.ncbi.nlm.nih.gov/nucleotide/AJ276859.1</a> |

---

**Supplemental Table 2.** The same samples used for the inter-laboratory specificity testing of the new ISAV multiplex assay that we developed, undertaken at the Technical University of Denmark (DTU). When available, we identified samples by GenBank accession. We also provided the number of isolates in each category, geographic origin, and strain. In the final 2 columns we recorded the qualitative results of the generic ISAV segment 8 assay (404F\_ISA8/583R\_ISA8/491\_ISA8)<sup>7</sup> that was designed to amplify any strain of ISAV, followed by the results for the ISAV-HPR0 specific assay we developed in this research.

| Sample ID or GenBank accession                                                                                                                                                                                      | Isolates | Geographic origin | Strain                       | Generic ISAV assay result | HPR0 assay result |
|---------------------------------------------------------------------------------------------------------------------------------------------------------------------------------------------------------------------|----------|-------------------|------------------------------|---------------------------|-------------------|
| MK216303, MK216305, MK216306, MK216307, MK216308, MK216310, MK216321, MK216313, MN901913/MN901918, MN901916/MN901921, MN901917/MN901922, MT413436/MT413443, MT413437/MT413444, MT613037/MT613041, MT990389/MT997778 | 15       | Norway            | ISAV-HPRΔ                    | +                         | -                 |
| MT990384/MT997773                                                                                                                                                                                                   | 1        | Norway            | ISAV-HPR0                    | +                         | +                 |
| 2018-50-202_1*+ 2020-02-10_4*                                                                                                                                                                                       | 1        | Norway            | Mix of ISAV-HPRΔ & ISAV-HPR0 | +                         | +                 |
| AJ276859                                                                                                                                                                                                            | 1        | Scotland          | ISAV-HPRΔ                    | +                         | -                 |
| Negative <i>Salmo salar</i> gills and cells*                                                                                                                                                                        | 2        | Denmark           | Negative controls            | -                         | -                 |

\* Samples provided from the National Institute of Aquatic Resources at the Technical University of Denmark (DTU) without sequences uploaded to NCBI GenBank.

**Supplemental Table 3.** Sensitivity comparison between the generic ISAV segment 8 assay<sup>7</sup> and the ISAV-HPR0 assay that we developed. We completed 10 replicates at each of the different dilution amounts of artificial positive control (APC). We recorded the mean Cq value for each dilution for both the generic ISAV assay and the ISAV-HPR0 specific assay and the mean Cq difference between the two. A negative mean Cq difference indicates that, for that APC dilution, the generic ISAV assay was more sensitive because it produced a lower mean Cq, given the same concentration of template.

| APC dilution      | Generic ISAV assay <sup>7</sup> mean Cq | ISAV-HPR0 mean Cq | Mean Cq difference |
|-------------------|-----------------------------------------|-------------------|--------------------|
| 10 <sup>-4</sup>  | 15.37                                   | 15.97             | -0.602             |
| 10 <sup>-5</sup>  | 18.64                                   | 19.41             | -0.773             |
| 10 <sup>-6</sup>  | 22.08                                   | 22.86             | -0.778             |
| 10 <sup>-7</sup>  | 25.50                                   | 26.11             | -0.607             |
| 10 <sup>-8</sup>  | 28.91                                   | 29.37             | -0.459             |
| 10 <sup>-9</sup>  | 32.44                                   | 32.68             | -0.240             |
| 10 <sup>-10</sup> | 36.08                                   | 35.74             | 0.342              |
| Mean of means     |                                         |                   | -0.445             |

**Supplemental Table 4.** Results from the inter-laboratory comparison using subsamples of the same gill clips collected from the National Cold Water Marine Aquaculture Center (NCWMAC) and distributed to the University of Maine Cooperative Extension Diagnostic and Research Laboratory (UMCEDRL) and Kennebec River Biosciences (KRB). For each sample, we have included the average generic ISAV assay<sup>7</sup> Cq values as well as those for the new ISAV-HPR0 assay. While run on different instruments, we used the same PCR protocol at UMCEDRL and NCWMAC, in contrast to a different generic ISAV assay used at KRB.<sup>37</sup> Finally, we have included the qualitative results for each sample, which included positive (Pos), negative (Neg), and inconclusive (Inc). An inconclusive result was declared when at least one PCR replicate tested positive for that particular assay, but it could not be replicated in further confirmatory assays.

| Sample | UMCEDRL                   |      |        | NCWMAC                    |      |        | KRB                        |        |
|--------|---------------------------|------|--------|---------------------------|------|--------|----------------------------|--------|
|        | Generic ISAV <sup>7</sup> | HPR0 | Result | Generic ISAV <sup>7</sup> | HPR0 | Result | Generic ISAV <sup>37</sup> | Result |
| 1      | 33.7                      | 34.8 | Inc    | 0                         | 0    | Neg    | 0                          | Neg    |
| 2      | 0                         | 0    | Neg    | 0                         | 0    | Neg    | 0                          | Neg    |
| 3      | 0                         | 0    | Neg    | 0                         | 0    | Neg    | 0                          | Neg    |
| 4      | 0                         | 0    | Neg    | 0                         | 0    | Neg    | 0                          | Neg    |
| 5      | 0                         | 0    | Neg    | 30.5                      | 29.9 | Pos    | 0                          | Neg    |
| 6      | 0                         | 0    | Neg    | 0                         | 0    | Neg    | 0                          | Neg    |
| 7      | 0                         | 0    | Neg    | 0                         | 0    | Neg    | 0                          | Neg    |
| 8      | 0                         | 0    | Neg    | 0                         | 0    | Neg    | 0                          | Neg    |
| 9      | 0                         | 0    | Neg    | 0                         | 0    | Neg    | 0                          | Neg    |
| 10     | 0                         | 0    | Neg    | 0                         | 0    | Neg    | 0                          | Neg    |
| 11     | 0                         | 0    | Neg    | 0                         | 0    | Neg    | 0                          | Neg    |
| 12     | 31.7                      | 31.3 | Pos    | 0                         | 0    | Neg    | 0                          | Neg    |
| 13     | 31.7                      | 31.2 | Pos    | 37.2                      | 37.8 | Inc    | 36                         | Pos    |
| 14     | 34                        | 35   | Inc    | 0                         | 0    | Neg    | 35.7                       | Pos    |
| 15     | 34.7                      | 34.3 | Pos    | 0                         | 0    | Neg    | 0                          | Neg    |

Salmon isavirus phenotype multiplex RT-qPCR

|    |      |      |     |      |      |     |      |     |
|----|------|------|-----|------|------|-----|------|-----|
| 16 | 31.1 | 31.3 | Pos | 0    | 0    | Neg | 38.6 | Inc |
| 17 | 0    | 0    | Neg | 0    | 0    | Neg | 0    | Neg |
| 18 | 33.5 | 30.6 | Pos | 27.4 | 27.2 | Pos | 33.5 | Pos |
| 19 | 31.9 | 32.8 | Inc | 39.8 | 0    | Inc | 0    | Neg |
| 20 | 0    | 0    | Neg | 0    | 0    | Neg | 0    | Neg |
| 21 | 0    | 0    | Neg | 0    | 0    | Neg | 0    | Neg |
| 22 | 32.7 | 34.1 | Pos | 0    | 0    | Neg | 0    | Neg |
| 23 | 31.7 | 31.3 | Pos | 0    | 39.9 | Neg | 37.7 | Pos |
| 24 | 34.4 | 32.2 | Pos | 0    | 0    | Neg | 36.6 | Inc |
| 25 | 32.6 | 31.4 | Pos | 29.4 | 28.6 | Pos | 0    | Neg |
| 26 | 0    | 0    | Neg | 0    | 0    | Neg | 0    | Neg |
| 27 | 28.2 | 27.5 | Pos | 32   | 30.7 | Pos | 33.8 | Pos |
| 28 | 33.8 | 32.7 | Inc | 0    | 0    | Neg | 0    | Neg |
| 29 | 29.6 | 29.5 | Pos | 0    | 0    | Neg | 0    | Neg |
| 30 | 31.5 | 31   | Pos | 29.5 | 29.1 | Pos | 32.1 | Pos |
| 31 | 32.2 | 31.3 | Pos | 33.7 | 31.2 | Pos | 32.3 | Pos |
| 32 | 0    | 0    | Neg | 29.1 | 28.5 | Pos | 36.4 | Pos |
| 33 | 27.7 | 26.5 | Pos | 0    | 0    | Neg | 0    | Neg |
| 34 | 31.3 | 29.8 | Pos | 28.7 | 28   | Pos | 34.6 | Pos |
| 35 | 31.2 | 31   | Pos | 29.4 | 28.4 | Pos | 33.2 | Pos |
| 36 | 29.5 | 30.7 | Pos | 27.2 | 27.1 | Pos | 31.7 | Pos |
| 37 | 32.3 | 33.3 | Pos | 37.1 | 35.3 | Inc | 33.4 | Pos |
| 38 | 29.7 | 29.3 | Pos | 30.9 | 29.7 | Pos | 0    | Neg |
| 39 | 31   | 30.9 | Pos | 30.4 | 29.3 | Pos | 36.7 | Pos |
| 40 | 30.3 | 30.3 | Pos | 0    | 0    | Neg | 32.8 | Pos |
| 41 | 31.1 | 30.9 | Pos | 0    | 0    | Neg | 36.8 | Inc |
| 42 | 23.7 | 24   | Pos | 0    | 0    | Neg | 33.6 | Pos |
| 43 | 29.2 | 28.1 | Pos | 25.6 | 25.2 | Pos | 28.7 | Pos |
| 44 | 32.3 | 31.6 | Pos | 29.6 | 28.6 | Pos | 35.6 | Pos |
| 45 | 34.1 | 34.1 | Pos | 0    | 0    | Neg | 0    | Neg |
| 46 | 0    | 0    | Neg | 0    | 0    | Neg | 0    | Neg |
| 47 | 32.6 | 30.5 | Pos | 0    | 0    | Neg | 0    | Neg |
| 48 | 29.8 | 28.9 | Pos | 26.8 | 26.5 | Pos | 32.8 | Pos |
| 49 | 30   | 29.3 | Pos | 0    | 37   | Neg | 35.9 | Pos |

Salmon isavirus phenotype multiplex RT-qPCR

|    |      |      |     |      |      |     |      |     |
|----|------|------|-----|------|------|-----|------|-----|
| 50 | 30.4 | 31.3 | Pos | 0    | 0    | Neg | 37.1 | Pos |
| 51 | 0    | 0    | Neg | 0    | 0    | Neg | 0    | Neg |
| 52 | 33.8 | 33.7 | Pos | 0    | 0    | Neg | 0    | Neg |
| 53 | 31.7 | 31.4 | Pos | 0    | 39.2 | Neg | 36.6 | Pos |
| 54 | 27.7 | 27.8 | Pos | 26.2 | 26.1 | Pos | 31.4 | Pos |
| 55 | 30.9 | 31.9 | Pos | 36.7 | 33.1 | Inc | 0    | Neg |
| 56 | 31.9 | 31.9 | Pos | 34.9 | 32.5 | Pos | 36   | Pos |
| 57 | 31.3 | 31.3 | Pos | 0    | 0    | Neg | 37.5 | Inc |
| 58 | 26.8 | 28.3 | Pos | 34.8 | 32.6 | Inc | 36.2 | Pos |
| 59 | 0    | 0    | Neg | 0    | 0    | Neg | 38.9 | Inc |
| 60 | 29.8 | 30.5 | Pos | 32.7 | 31.1 | Pos | 35.4 | Pos |
| 61 | 26.8 | 27.1 | Pos | 27.4 | 26.6 | Pos | 31.1 | Pos |
| 62 | 0    | 0    | Neg | 0    | 0    | Neg | 38.8 | Pos |
| 63 | 24.2 | 24.8 | Pos | 22.7 | 22.2 | Pos | 29.2 | Pos |
| 64 | 25.3 | 25.4 | Pos | 29.1 | 28.3 | Pos | 30.7 | Pos |
| 65 | 32.4 | 33.4 | Pos | 0    | 0    | Neg | 35.3 | Pos |
| 66 | 32.6 | 31.7 | Pos | 30.4 | 29.3 | Pos | 33.3 | Pos |
| 67 | 28   | 28.1 | Pos | 29.9 | 30.3 | Pos | 29.4 | Pos |
| 68 | 29.6 | 30.1 | Pos | 27.4 | 27.3 | Pos | 29.6 | Pos |
| 69 | 32.3 | 31.9 | Pos | 33.9 | 31.3 | Pos | 0    | Neg |
| 70 | 0    | 0    | Neg | 0    | 0    | Neg | 0    | Neg |
| 71 | 0    | 0    | Neg | 0    | 0    | Neg | 0    | Neg |
| 72 | 23.2 | 33.9 | Inc | 0    | 34.2 | Neg | 33.9 | Pos |
| 73 | 30.7 | 31.8 | Pos | 30.8 | 29.8 | Pos | 37.7 | Inc |
| 74 | 31.4 | 31.2 | Pos | 35.1 | 31.8 | Pos | 34.2 | Pos |
| 75 | 27.2 | 27.7 | Pos | 27.6 | 27.4 | Pos | 32.5 | Pos |
| 76 | 26.8 | 27.8 | Pos | 29.3 | 29   | Pos | 32.1 | Pos |
| 77 | 31.3 | 31.2 | Pos | 27.6 | 27.3 | Pos | 35.8 | Pos |
| 78 | 27.1 | 27.3 | Pos | 32.2 | 30.9 | Pos | 35.5 | Inc |
| 79 | 24.8 | 24.4 | Pos | 0    | 37.2 | Neg | 33.1 | Pos |
| 80 | 19.4 | 19.5 | Pos | 21.7 | 21.1 | Pos | 30.6 | Pos |
| 81 | 32.5 | 32.1 | Pos | 28.9 | 28.2 | Pos | 35.9 | Pos |
| 82 | 31.5 | 28.2 | Pos | 40.6 | 0    | Inc | 33.3 | Pos |
| 83 | 30.3 | 29.7 | Pos | 37.2 | 35.4 | Inc | 33.4 | Pos |

Salmon isavirus phenotype multiplex RT-qPCR

|     |      |      |     |      |      |     |      |     |
|-----|------|------|-----|------|------|-----|------|-----|
| 84  | 31.8 | 32.6 | Pos | 0    | 0    | Neg | 34.3 | Pos |
| 85  | 33   | 32.6 | Inc | 36.8 | 37.6 | Inc | 33.2 | Pos |
| 86  | 29.8 | 30   | Pos | 0    | 0    | Neg | 33.2 | Pos |
| 87  | 26.2 | 27   | Pos | 27.2 | 27.2 | Pos | 29.7 | Pos |
| 88  | 29.7 | 30   | Pos | 33.1 | 33   | Inc | 31.1 | Pos |
| 89  | 30.8 | 30.4 | Pos | 23.6 | 23.2 | Pos | 34.3 | Pos |
| 90  | 31.2 | 31.1 | Pos | 30   | 28.7 | Pos | 34   | Pos |
| 91  | 25.8 | 25.8 | Pos | 26.8 | 26.6 | Pos | 31.6 | Pos |
| 92  | 30.2 | 30   | Pos | 0    | 0    | Neg | 36   | Pos |
| 93  | 32.3 | 32.2 | Pos | 36.6 | 39.2 | Inc | 36.6 | Inc |
| 94  | 31.6 | 30.7 | Pos | 0    | 0    | Neg | 33.5 | Pos |
| 95  | 29.1 | 31   | Inc | 27.4 | 26.6 | Pos | 36.1 | Pos |
| 96  | 30.4 | 31.1 | Pos | 33.7 | 31.4 | Pos | 32.1 | Pos |
| 97  | 24.4 | 24   | Pos | 24.6 | 24.3 | Pos | 27.8 | Pos |
| 98  | 30.4 | 29.8 | Pos | 31.6 | 30.8 | Pos | 32.9 | Pos |
| 99  | 28.1 | 29.3 | Pos | 28.2 | 27.6 | Pos | 32.9 | Pos |
| 100 | 29.5 | 30.7 | Pos | 40   | 33.6 | Inc | 33.9 | Pos |
| 101 | 30.1 | 29.1 | Pos | 28.6 | 27.8 | Pos | 31.2 | Pos |
| 102 | 0    | 0    | Neg | 0    | 0    | Neg | 0    | Neg |
| 103 | 31.5 | 32.3 | Pos | 32.3 | 30.8 | Pos | 36   | Inc |
| 104 | 35.1 | 32.7 | Pos | 0    | 35.3 | Neg | 37.7 | Pos |
| 105 | 30.9 | 30.6 | Inc | 0    | 0    | Neg | 0    | Neg |
| 106 | 27.1 | 27.3 | Pos | 29.7 | 27.8 | Pos | 27.6 | Pos |
| 107 | 0    | 0    | Neg | 0    | 0    | Neg | 35.2 | Pos |
| 108 | 29   | 29.4 | Pos | 27.2 | 26.3 | Pos | 30.3 | Pos |
| 109 | 28.5 | 28.9 | Pos | 27   | 27   | Pos | 32.8 | Pos |
| 110 | 0    | 0    | Neg | 0    | 0    | Neg | 0    | Neg |
| 111 | 0    | 0    | Neg | 0    | 38   | Neg | 31.8 | Pos |
| 112 | 0    | 0    | Neg | 0    | 0    | Neg | 0    | Neg |
| 113 | 0    | 0    | Neg | 0    | 0    | Neg | 33.1 | Pos |
| 114 | 0    | 0    | Neg | 0    | 0    | Neg | 36.5 | Pos |
| 115 | 0    | 0    | Neg | 0    | 0    | Neg | 35.3 | Pos |
| 116 | 0    | 0    | Neg | 0    | 0    | Neg | 0    | Neg |
| 117 | 0    | 0    | Neg | 0    | 0    | Neg | 0    | Neg |



Salmon isavirus phenotype multiplex RT-qPCR

|      |      |      |     |      |      |     |      |     |
|------|------|------|-----|------|------|-----|------|-----|
| 118  | 0    | 0    | Neg | 0    | 0    | Neg | 0    | Neg |
| 119  | 0    | 0    | Neg | 0    | 0    | Neg | 0    | Neg |
| 120  | 0    | 0    | Neg | 0    | 0    | Neg | 0    | Neg |
| 121  | 34.6 | 36.3 | Inc | 0    | 0    | Neg | 0    | Neg |
| 122  | 28.2 | 27.9 | Pos | 27   | 26.2 | Pos | 31   | Pos |
| 123  | 27.7 | 28.2 | Pos | 28.3 | 28   | Pos | 30.1 | Pos |
| 124  | 19.1 | 18.9 | Pos | 18.4 | 18.4 | Pos | 22.8 | Pos |
| 125  | 35.1 | 34.8 | Pos | 0    | 0    | Neg | 35.1 | Pos |
| 126  | 28.4 | 29   | Pos | 40.5 | 36   | Inc | 35.7 | Pos |
| 127  | 18.3 | 18.5 | Pos | 17   | 17.1 | Pos | 19.8 | Pos |
| 128  | 22.2 | 22.4 | Pos | 22   | 21.5 | Pos | 22.6 | Pos |
| 129  | 35   | 34.1 | Inc | 0    | 40.9 | Neg | 33.7 | Pos |
| 130  | 28.8 | 29.2 | Pos | 35.8 | 34   | Pos | 36.7 | Pos |
| 131  | 22.8 | 22.8 | Pos | 21.7 | 21.3 | Pos | 25.8 | Pos |
| 132  | 20.7 | 20.7 | Pos | 16.1 | 15.8 | Pos | 21.9 | Pos |
| 133  | 34.5 | 33.6 | Inc | 0    | 0    | Neg | 34.6 | Pos |
| 134  | 32.5 | 32.3 | Pos | 28.7 | 31.6 | Pos | 36.1 | Pos |
| 135  | 25   | 25.1 | Pos | 22.5 | 22.1 | Pos | 22.8 | Pos |
| 136  | 33.1 | 33.2 | Pos | 0    | 0    | Neg | 32   | Pos |
| 137  | 30.3 | 30.9 | Pos | 29.3 | 28.3 | Pos | 36.9 | Inc |
| 138  | 31.9 | 32.4 | Pos | 34.1 | 31.1 | Pos | 33.7 | Pos |
| 139  | 30.8 | 30.3 | Pos | 33.1 | 28.5 | Pos | 34.2 | Pos |
| 140  | 21.3 | 21.8 | Pos | 17.9 | 17.3 | Pos | 21.2 | Pos |
| 141  | 0    | 0    | Neg | 19.4 | 19.2 | Pos | 24.2 | Pos |
| 142  | 28.5 | 28.6 | Pos | 0    | 35.6 | Neg | 33.4 | Pos |
| 143  | 31.9 | 31.2 | Pos | 31.1 | 30.4 | Pos | 34.3 | Pos |
| 144  | 32.6 | 31.4 | Pos | 27.6 | 26.8 | Pos | 34.5 | Pos |
| 145  | 26.3 | 26.4 | Pos | 23   | 22.5 | Pos | 25.9 | Pos |
| 146  | 19.1 | 19.4 | Pos | 21.6 | 21.3 | Pos | 23.9 | Pos |
| 147  | 20.5 | 20.8 | Pos | 21.1 | 21   | Pos | 26.7 | Pos |
| 148  | 20.8 | 21.7 | Pos | 22.1 | 22   | Pos | 26.9 | Pos |
| 149  | 31.5 | 28.8 | Pos | 29.1 | 28.4 | Pos | 32.6 | Pos |
| 150  | 19.3 | 19.5 | Pos | 20.9 | 20.8 | Pos | 27.2 | Pos |
| 151* | —    | —    | —   | —    | —    | —   | —    | —   |

Salmon isavirus phenotype multiplex RT-qPCR

|     |      |      |     |      |      |     |      |     |
|-----|------|------|-----|------|------|-----|------|-----|
| 152 | 31.5 | 31.2 | Pos | 27.2 | 26.6 | Pos | 32.7 | Pos |
| 153 | 21.3 | 21.8 | Pos | 18.5 | 18.1 | Pos | 25.8 | Pos |
| 154 | 21.5 | 22   | Pos | 18.5 | 18.1 | Pos | 24.5 | Pos |
| 155 | 27.3 | 27.1 | Pos | 28   | 27.1 | Pos | 32.2 | Pos |
| 156 | 15.4 | 15.9 | Pos | 16.2 | 16   | Pos | 20   | Pos |
| 157 | 32   | 31   | Pos | 26.6 | 26.4 | Pos | 31.3 | Pos |
| 158 | 23.6 | 23.8 | Pos | 24.6 | 24.6 | Pos | 27.6 | Pos |
| 159 | 29.1 | 28.9 | Pos | 28   | 27.6 | Pos | 30.4 | Pos |
| 160 | 28.4 | 29.3 | Pos | 26.7 | 25.5 | Pos | 31.9 | Pos |
| 161 | 14.7 | 14.8 | Pos | 13   | 12.8 | Pos | 17.8 | Pos |
| 162 | 23.6 | 23.6 | Pos | 23.9 | 23.3 | Pos | 30.5 | Pos |
| 163 | 28   | 27.4 | Pos | 28.5 | 27.5 | Pos | 30.6 | Pos |
| 164 | 27.7 | 28.2 | Pos | 34.3 | 31.9 | Pos | 31.1 | Pos |
| 165 | 28.4 | 28.7 | Pos | 26.8 | 25.3 | Pos | 33.7 | Pos |
| 166 | 25.8 | 25.6 | Pos | 24.9 | 24.6 | Pos | 29.7 | Pos |
| 167 | 23.7 | 23.8 | Pos | 22.8 | 22.3 | Pos | 25.2 | Pos |
| 168 | 28.7 | 28.4 | Pos | 29.4 | 28.8 | Pos | 30.5 | Pos |
| 169 | 14.8 | 14.5 | Pos | 13   | 12.7 | Pos | 17.7 | Pos |
| 170 | 21.4 | 21.5 | Pos | 22.2 | 22   | Pos | 26.3 | Pos |
| 171 | 23.3 | 22.9 | Pos | 24.4 | 24.2 | Pos | 28.7 | Pos |
| 172 | 25.1 | 25   | Pos | 24   | 23.6 | Pos | 29.4 | Pos |
| 173 | 26.7 | 27   | Pos | 25.1 | 24.7 | Pos | 28.1 | Pos |
| 174 | 25.7 | 26.2 | Pos | 30.1 | 29.4 | Pos | 29.2 | Pos |
| 175 | 28.1 | 28.8 | Pos | 26.8 | 26.2 | Pos | 29   | Pos |
| 176 | 32.2 | 31.4 | Pos | 39.5 | 30.4 | Inc | 0    | Neg |
| 177 | 29   | 28.5 | Pos | 28.5 | 28.2 | Pos | 34.7 | Pos |
| 178 | 32.1 | 31.8 | Pos | 35.9 | 34.1 | Inc | 37.7 | Pos |
| 179 | 29.3 | 30.2 | Pos | 0    | 0    | Neg | 29.7 | Pos |
| 180 | 30.2 | 30.1 | Pos | 26.1 | 25.6 | Pos | 31.7 | Pos |
| 181 | 29.9 | 29.7 | Pos | 34.4 | 32.5 | Pos | 37   | Pos |
| 182 | 0    | 0    | Inc | 0    | 0    | Neg | 0    | Neg |
| 183 | 34   | 33.3 | Pos | 0    | 39.8 | Neg | 0    | Neg |

\* Sample 151 was the result of a numbering error and does not exist. It was included in the dataset to reduce confusion because the sample numbers would otherwise skip from 150 to 152.

**Supplemental Table 5.** The categorical data we collected when classifying each of the ISAV-positive fish gill samples at the University of Maine Cooperative Extension Diagnostic and Research Laboratory (UMCEDRL), Kennebec River Biosciences (KRB), and the National Cold Water Marine Aquaculture Center (NCWMAC). We classified samples as negative (Neg) if there was no Cq for the generic ISAV segment 8 assay used at that particular location (UMCEDRL,<sup>7</sup> KRB,<sup>37</sup> NCWMAC<sup>7</sup>), and inconclusive (Inc) if a positive result was declared on one replicate, but could not be recreated, even after additional reruns. Samples that we found to be positive were further classified into the “high-infected” (High) and “low-infected” (Low) categories. High samples had higher quantities of viral material and were classified as such if the Cq was <30. Low samples had lesser quantities of virus, and we placed positive samples into this group with Cq values  $\geq 30$ .

| Sample ID | UMCEDRL <sup>7</sup> | KRB <sup>37</sup> | NCWMAC <sup>7</sup> |
|-----------|----------------------|-------------------|---------------------|
| 1         | Inc                  | Neg               | Neg                 |
| 2         | Neg                  | Neg               | Neg                 |
| 3         | Neg                  | Neg               | Neg                 |
| 4         | Neg                  | Neg               | Neg                 |
| 5         | Neg                  | Neg               | Low                 |
| 6         | Neg                  | Neg               | Neg                 |
| 7         | Neg                  | Neg               | Neg                 |
| 8         | Neg                  | Neg               | Neg                 |
| 9         | Neg                  | Neg               | Neg                 |
| 10        | Neg                  | Neg               | Neg                 |
| 11        | Neg                  | Neg               | Neg                 |
| 12        | Low                  | Neg               | Neg                 |
| 13        | Low                  | Low               | Inc                 |

Salmon isavirus phenotype multiplex RT-qPCR

|    |      |     |      |
|----|------|-----|------|
| 14 | Inc  | Low | Neg  |
| 15 | Low  | Neg | Neg  |
| 16 | Low  | Inc | Neg  |
| 17 | Neg  | Neg | Neg  |
| 18 | Low  | Low | High |
| 19 | Inc  | Neg | Inc  |
| 20 | Neg  | Neg | Neg  |
| 21 | Neg  | Neg | Neg  |
| 22 | Low  | Neg | Neg  |
| 23 | Low  | Low | Neg  |
| 24 | Low  | Inc | Neg  |
| 25 | Low  | Neg | High |
| 26 | Neg  | Neg | Neg  |
| 27 | High | Low | Low  |
| 28 | Inc  | Neg | Neg  |
| 29 | High | Neg | Neg  |
| 30 | Low  | Low | High |
| 31 | Low  | Low | Low  |
| 32 | Neg  | Low | High |
| 33 | High | Neg | Neg  |
| 34 | Low  | Low | High |
| 35 | Low  | Low | High |
| 36 | High | Low | High |
| 37 | Low  | Low | Inc  |
| 38 | High | Neg | Low  |
| 39 | Low  | Low | Low  |
| 40 | Low  | Low | Neg  |

Salmon isavirus phenotype multiplex RT-qPCR

|    |      |      |      |
|----|------|------|------|
| 41 | Low  | Inc  | Neg  |
| 42 | High | Low  | Neg  |
| 43 | High | High | High |
| 44 | Low  | Low  | High |
| 45 | Low  | Neg  | Neg  |
| 46 | Neg  | Neg  | Neg  |
| 47 | Low  | Neg  | Neg  |
| 48 | High | Low  | High |
| 49 | Low  | Low  | Neg  |
| 50 | Low  | Low  | Neg  |
| 51 | Neg  | Neg  | Neg  |
| 52 | Low  | Neg  | Neg  |
| 53 | Low  | Low  | Neg  |
| 54 | High | Low  | High |
| 55 | Low  | Neg  | Inc  |
| 56 | Low  | Low  | Low  |
| 57 | Low  | Inc  | Neg  |
| 58 | High | Low  | Inc  |
| 59 | Neg  | Inc  | Neg  |
| 60 | High | Low  | Low  |
| 61 | High | Low  | High |
| 62 | Neg  | Low  | Neg  |
| 63 | High | High | High |
| 64 | High | Low  | High |
| 65 | Low  | Low  | Neg  |
| 66 | Low  | Low  | Low  |
| 67 | High | High | High |

|    |      |      |      |
|----|------|------|------|
| 68 | High | High | High |
| 69 | Low  | Neg  | Low  |
| 70 | Neg  | Neg  | Neg  |
| 71 | Neg  | Neg  | Neg  |
| 72 | Inc  | Low  | Neg  |
| 73 | Low  | Inc  | Low  |
| 74 | Low  | Low  | Low  |
| 75 | High | Low  | High |
| 76 | High | Low  | High |
| 77 | Low  | Low  | High |
| 78 | High | Inc  | Low  |
| 79 | High | Low  | Neg  |
| 80 | High | Low  | High |
| 81 | Low  | Low  | High |
| 82 | Low  | Low  | Inc  |
| 83 | Low  | Low  | Inc  |
| 84 | Low  | Low  | Neg  |
| 85 | Inc  | Low  | Inc  |
| 86 | High | Low  | Neg  |
| 87 | High | High | High |
| 88 | High | Low  | Inc  |
| 89 | Low  | Low  | High |
| 90 | Low  | Low  | Low  |
| 91 | High | Low  | High |
| 92 | Low  | Low  | Neg  |
| 93 | Low  | Inc  | Inc  |
| 94 | Low  | Low  | Neg  |

Salmon isavirus phenotype multiplex RT-qPCR

|     |      |      |      |
|-----|------|------|------|
| 95  | Inc  | Low  | High |
| 96  | Low  | Low  | Low  |
| 97  | High | High | High |
| 98  | Low  | Low  | Low  |
| 99  | High | Low  | High |
| 100 | High | Low  | Inc  |
| 101 | Low  | Low  | High |
| 102 | Neg  | Neg  | Neg  |
| 103 | Low  | Inc  | Low  |
| 104 | Low  | Low  | Neg  |
| 105 | Inc  | Neg  | Neg  |
| 106 | High | High | High |
| 107 | Neg  | Low  | Neg  |
| 108 | High | Low  | High |
| 109 | High | Low  | High |
| 110 | Neg  | Neg  | Neg  |
| 111 | Neg  | Low  | Neg  |
| 112 | Neg  | Neg  | Neg  |
| 113 | Neg  | Low  | Neg  |
| 114 | Neg  | Low  | Neg  |
| 115 | Neg  | Low  | Neg  |
| 116 | Neg  | Neg  | Neg  |
| 117 | Neg  | Neg  | Neg  |
| 118 | Neg  | Neg  | Neg  |
| 119 | Neg  | Neg  | Neg  |
| 120 | Neg  | Neg  | Neg  |
| 121 | Inc  | Neg  | Neg  |

|     |      |      |      |
|-----|------|------|------|
| 122 | High | Low  | High |
| 123 | High | Low  | High |
| 124 | High | High | High |
| 125 | Low  | Low  | Neg  |
| 126 | High | Low  | Inc  |
| 127 | High | High | High |
| 128 | High | High | High |
| 129 | Inc  | Low  | Neg  |
| 130 | High | Low  | Low  |
| 131 | High | High | High |
| 132 | High | High | High |
| 133 | Inc  | Low  | Neg  |
| 134 | Low  | Low  | High |
| 135 | High | High | High |
| 136 | Low  | Low  | Neg  |
| 137 | Low  | Inc  | High |
| 138 | Low  | Low  | Low  |
| 139 | Low  | Low  | Low  |
| 140 | High | High | High |
| 141 | Neg  | High | High |
| 142 | High | Low  | Neg  |
| 143 | Low  | Low  | Low  |
| 144 | Low  | Low  | High |
| 145 | High | High | High |
| 146 | High | High | High |
| 147 | High | High | High |
| 148 | High | High | High |



|      |      |      |      |
|------|------|------|------|
| 149  | Low  | Low  | High |
| 150  | High | High | High |
| 151* | —    | —    | —    |
| 152  | Low  | Low  | High |
| 153  | High | High | High |
| 154  | High | High | High |
| 155  | High | Low  | High |
| 156  | High | High | High |
| 157  | Low  | Low  | High |
| 158  | High | High | High |
| 159  | High | Low  | High |
| 160  | High | Low  | High |
| 161  | High | High | High |
| 162  | High | Low  | High |
| 163  | High | Low  | High |
| 164  | High | Low  | Low  |
| 165  | High | Low  | High |
| 166  | High | High | High |
| 167  | High | High | High |
| 168  | High | Low  | High |
| 169  | High | High | High |
| 170  | High | High | High |
| 171  | High | High | High |
| 172  | High | High | High |
| 173  | High | High | High |
| 174  | High | High | Low  |
| 175  | High | High | High |

|     |      |      |      |
|-----|------|------|------|
| 176 | Low  | Neg  | Inc  |
| 177 | High | Low  | High |
| 178 | Low  | Low  | Inc  |
| 179 | High | High | Neg  |
| 180 | Low  | High | Low  |
| 181 | High | Low  | Low  |
| 182 | Inc  | Neg  | Neg  |
| 183 | Low  | Neg  | Neg  |

---

\* Sample 151 was the result of a numbering error and does not exist. It was included in the dataset to reduce confusion because the sample numbers would otherwise skip from 150 to 152.

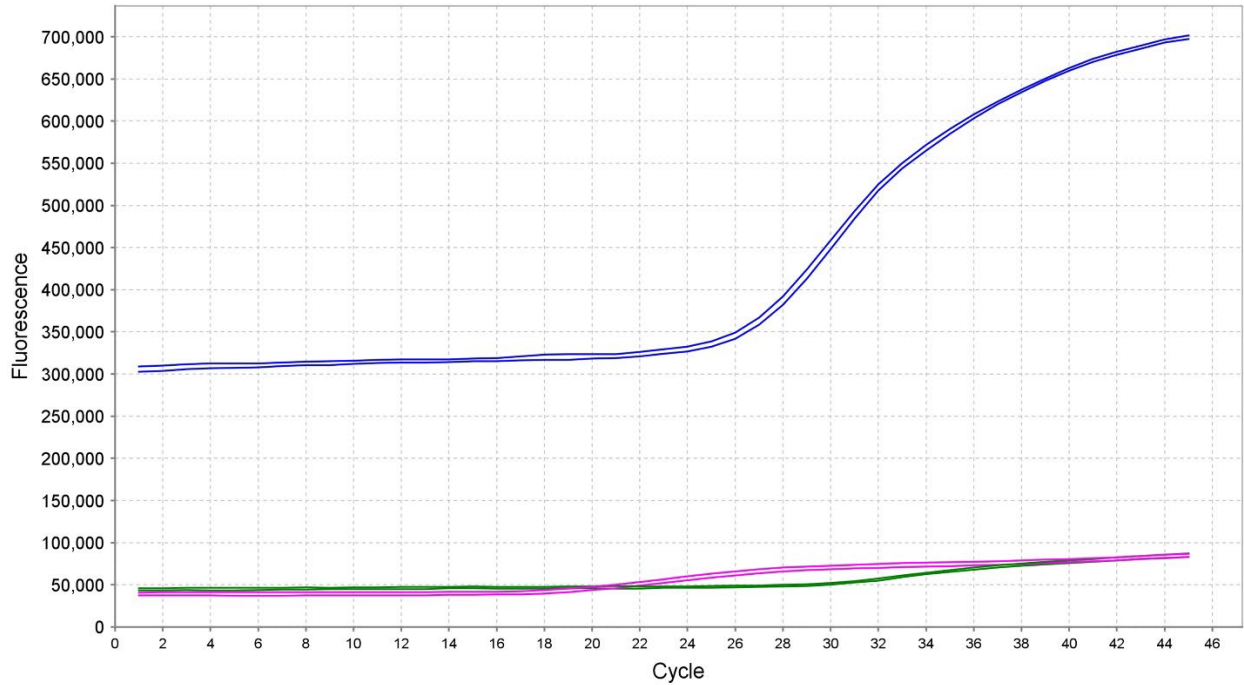

**Supplemental Figure 1.** Graph (cycle vs. fluorescence) of what we believe is a naturally occurring mixture of ISAV-HPR $\Delta$  and ISAV-HPR0 using our newly developed multiplex RT-qPCR assay. The generic ISAV segment 8 assay<sup>7</sup> is blue, the HPR0 assay is green, and the internal *Salmo salar* RNA positive control is pink. For this sample, we found that both the generic ISAV assay and the HPR0 assay produced Cq values; however, the Cq of the HPR0 assay was later than expected, and the curve was significantly flattened. Follow-up sequencing of this sample revealed that it was consistent with HPR $\Delta$ . We were then experimentally able to create a similar looking graph using an artificial mixture of ISAV-HPR $\Delta$  and ISAV-HPR0 (Suppl. Fig. 2).

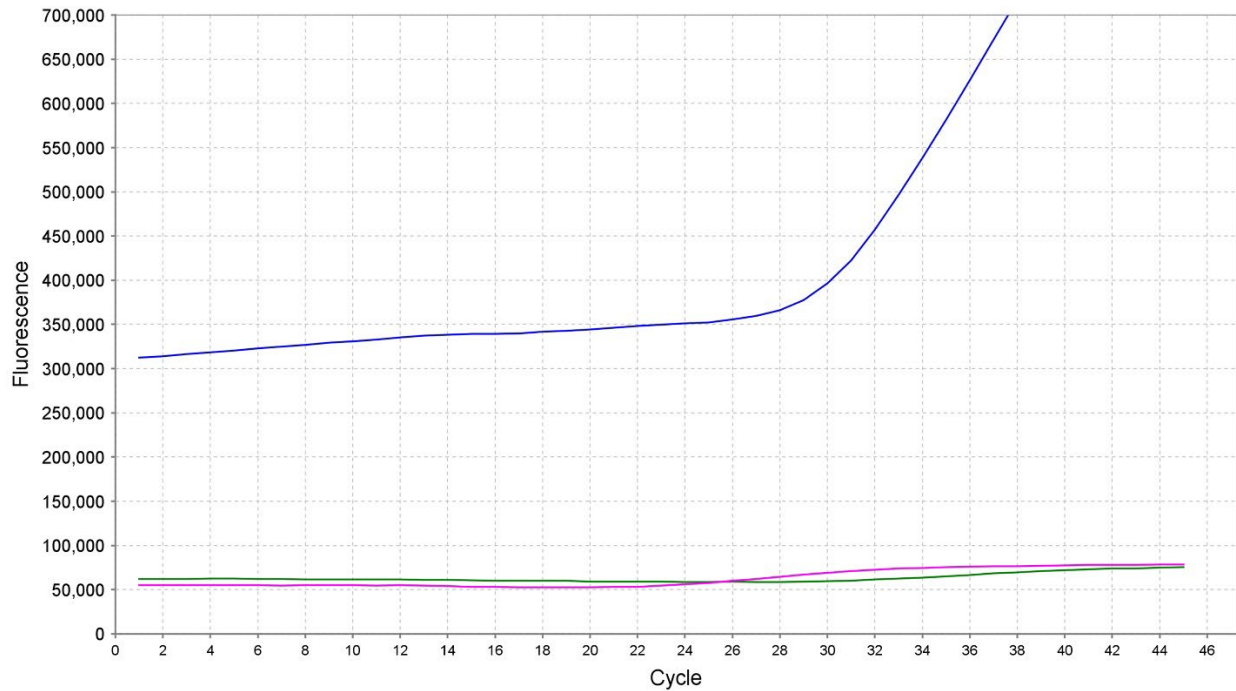

**Supplemental Figure 2.** Graph (cycle vs. fluorescence) of an artificial mixture of ISAV-HPR $\Delta$  and ISAV-HPR0 we created in an attempt to emulate the likely mixed sample we previously identified (Suppl. Fig. 1). This sample was a 6:1 mixture of ISAV-HPR $\Delta$ :ISAV-HPR0. The generic ISAV segment 8 assay<sup>7</sup> is blue, the HPR0 assay is green, and the internal *S. salar* RNA positive control is pink. Just as in Suppl Fig. 1, the HPR0 assay curve is severely flattened, and the Cq is later than expected, as compared to the generic ISAV assay.

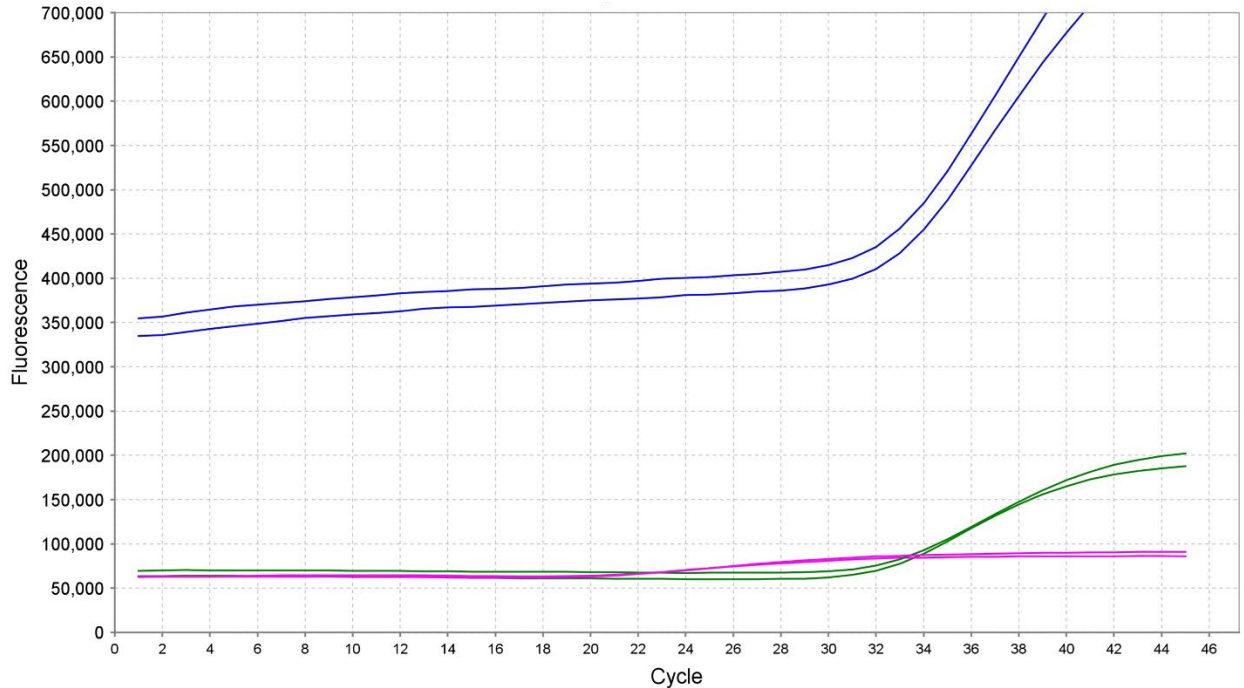

**Supplemental Figure 3.** Graph (cycle vs. fluorescence) of an artificial mixture of ISAV-HPR $\Delta$  and ISAV-HPR0 we created to test the responses of the multiplex RT-qPCR assay to these mixtures. This sample was a 1:6 mixture of ISAV-HPR $\Delta$ :ISAV-HPR0. The generic ISAV segment 8 assay<sup>7</sup> is blue, the HPR0 assay is green, and the internal *S. salar* RNA positive control is pink. In comparison to the generic ISAV assay, the C<sub>q</sub> of the HPR0 assay is slightly shifted and the amplification curve is flattened.
